1  
2  
3  
4  
5  
6  
7  
8  
9  
10  
11  
12  
13  
14  
15  
16  
17  
18  
19  
20  
21  
22  
23  
24  
25  
26  
27  
28  
29  
30  
31  
32  
33

**Fitness effects of competition within and between species change  
across species' ranges, and reveal limited local adaptation in rainforest  
*Drosophila***

Eleanor K. O'Brien, Megan Higgin, Christopher T. Jeffs, Ary A. Hoffmann, Jan  
Hrček, Owen T. Lewis & Jon R. Bridle

**Abstract**

Competition within and between species can have large effects on fitness and may therefore drive local adaptation. However, these effects are rarely tested systematically, or considered when predicting species' responses to environmental change. We used a field transplant experiment to test the effects of intra and interspecific competition on fitness across the ecological niches of two rainforest *Drosophila* species that replace each other along an elevation gradient. For the species with the broader elevational range, we also tested for adaptation to the local abiotic and biotic environment. In both species, intraspecific competition reduced productivity more than interspecific competition at the centre of its elevational range, while interspecific competition had a stronger effect at the range edge, where the competing species is more abundant. Local adaptation was detected in the centre of the range of the more widespread species, but only in the presence of intraspecific competition. This study is the first to demonstrate that fitness effects of inter-specific competition increase at ecological margins, while intraspecific competition has more pervasive effects at range centres. This is a key assumption of "tangled bank" models of community evolution and has

34 important implications for predicting the resilience of ecological networks to  
35 global change.

36

37

38

## 39 **Introduction**

40

41

42 Darwin (1859) used the metaphor of the “entangled bank” to describe the way  
43 that interactions within and among species structure an ecological community,  
44 due to the narrow range of conditions within which a given species can  
45 successfully compete with a neighbouring species. Competitive interactions  
46 can have large effects on fitness and are therefore likely to drive adaptive  
47 divergence within species (e.g. Stuart et al. 2014, Hargreaves et al. 2019). If  
48 we assume a trade-off between resistance to antagonistic interactions such  
49 as competition, parasitism or predation, and tolerance of abiotic conditions  
50 such as temperature or humidity, then antagonistic biotic interactions should  
51 narrow a species’ environmental niche by reducing the range of conditions  
52 within which it can persist, causing the evolution of ecological specialisation in  
53 communities (Kneitel & Chase 2003; Poisot et al. 2011). Such theory predicts  
54 that competition within a species (intraspecific competition) should have the  
55 strongest effect on fitness at the centre of the species’ distribution but will  
56 become less important towards the range edge. By contrast, at species’  
57 margins, a given level of interspecific competition should have a bigger effect  
58 on fitness, leading to species’ turnover along ecological gradients.  
59 Interspecific competition should therefore increase in its effects on fitness at

60 or beyond the margins of a species' range, especially where other closely  
61 related species (and likely competitors) increase in frequency.

62

63 Spatial variation in the effects of competition on fitness should cause local  
64 adaptation if these effects are consistent over time, especially where there is  
65 a trade-off between competitive success and resistance to abiotic stress.

66 Studies in angiosperms have found that competition can either increase (e.g.  
67 Bischoff et al. 2006; Rice & Knapp 2008) or decrease (e.g. Bischoff et al.  
68 2006) the magnitude of local adaptation. In a meta-analysis of field studies,  
69 mostly in plants, Hargreaves et al. (2019) found that local adaptation was  
70 neither more prevalent nor stronger in the presence of biotic interactions  
71 (including competition), compared with cases where biotic interactions were  
72 excluded, despite strong effects of biotic interactions on fitness. However,  
73 this effect varied with latitude: in tropical environments, local adaptation was  
74 more prevalent when biotic interactions were left intact, however this was not  
75 the case in temperate environments.

76

77 Strong and pervasive effects of competition on fitness may be more likely in  
78 low latitude (tropical) ecosystems, where productivity and biodiversity are  
79 generally much higher than in temperate ecosystems, where stronger  
80 seasonal fluctuations continually reduce or reset biotic interactions (e.g. Coley  
81 & Barone 1996; Schemske et al 2009). At a given latitude, the effects of biotic  
82 interactions on fitness should also vary along elevational gradients, given their  
83 pervasive effect on community structure, species turnover, and species'  
84 ecology, as well as climatic factors (e.g. Rahbek 1995; Körner 2007; Morris et

85 al. 2015). Consistent with expectations along latitudinal gradients, biotic  
86 interactions should be a more important determinant of species' ecological  
87 limits at lower elevation ("warm") margins, compared with high elevation  
88 ("cold") margins where effects of abiotic factors (e.g. temperature,  
89 precipitation) are relatively stronger (e.g. Davis et al. 1998; Pearson &  
90 Dawson 2003).

91

92 Ecosystems where closely related and ecologically similar species replace  
93 each other across predictable environmental gradients provide excellent  
94 opportunities to test how competition within and among species affects fitness  
95 and drives local adaptation, and how these effects change as species  
96 approach their ecological limits. In practice however, it is difficult to  
97 disentangle the effects of competition from those of abiotic factors (e.g.  
98 temperature, precipitation) on fitness or as drivers of adaptive divergence,  
99 because different sources of environmental variation are typically correlated  
100 (Godsoe *et al.* 2017). Experiments that manipulate competition and abiotic  
101 environmental variation independently are therefore essential for  
102 understanding how environmental change mediates the evolution of species  
103 interactions.

104

105 In the Australian tropical rainforest fruit fly *Drosophila birchii*, transplant  
106 experiments have demonstrated that abiotic factors alone cannot explain the  
107 species' field abundance across its climatic range, suggesting an important  
108 role for biotic interactions. O'Brien et al. (2017) tested how the fitness of  
109 families of *D. birchii* varied when virgin flies were transplanted at a fixed

110 density into field cages at 10 sites along each of two elevation gradients and  
111 allowed to mate and produce offspring. They found that fitness (estimated by  
112 number of offspring produced) in field cages was highest at the warmest, low  
113 elevation sites and declined with increasing elevation. This pattern contrasted  
114 with patterns of field abundance, where *D. birchii* was rare at low elevation  
115 sites but increased in abundance with elevation up to ~900m asl. However,  
116 given these field cages contained only a single species at low density, the  
117 effects of competition and other biotic interactions on fitness were not  
118 included. The results from these transplant experiments therefore suggested  
119 that although abiotic factors (probably cold limits) can explain the upper limit  
120 to *D. birchii*'s elevational range, biotic interactions limit population growth at  
121 the warm edge of *D. birchii*'s range, leading to a mismatch between cage  
122 productivity and field abundance at low elevations. Despite observing  
123 substantial genetic variation in fitness of *D. birchii* in field cages (and clinal  
124 divergence in productivity under laboratory conditions), O'Brien et al (2017)  
125 did not detect any evidence for local adaptation in these field transplants: *D.*  
126 *birchii* families transplanted to their home site did not have higher fitness  
127 when compared with those transplanted from the opposite extreme of the  
128 species' elevational range. However, if competitive interactions are a major  
129 determinant of fitness across the elevational range of *D. birchii*, local  
130 adaptation may only be revealed in an environment that includes these  
131 interactions.

132

133 In this study, we use a large-scale field transplant experiment to quantify the  
134 effects of ecologically-realistic variation in the intensity of intraspecific and

135 interspecific competition on variation in fitness and life history traits of *D.*  
136 *birchii* and its phylogenetically and ecologically-close relative, *D. bunnanda*. In  
137 a novel advance on most previous studies, we conduct these assays of  
138 density dependent variation in fitness at sites along one of the elevational  
139 gradients used in O'Brien *et al.* (2017), which we already know includes the  
140 cold and warm extremes of these species' distributions. In addition, for *D.*  
141 *birchii*, which is found across a broader range of elevations than *D. bunnanda*,  
142 we tested for local adaptation by transplanting flies from different populations  
143 across their elevational range. This comparison tested whether local  
144 adaptation was revealed by comparing responses of flies from different  
145 populations to increasing inter and intraspecific competition at different  
146 elevations along the gradient.

147

148 We tested the following hypotheses:

149 (1) *The fitness effects of competition is strongest at the warm edge of the*  
150 *species' ranges: Competition within and between *D. birchii* and *D.**  
151 *bunnanda will reduce fitness, but the strength of this effect will vary*  
152 *across the elevational gradient. We predict a stronger effect of*  
153 *competition on fitness at lower elevations, consistent with the*  
154 *expectation that antagonistic biotic interactions are more ecologically*  
155 *important at the warm edges of species' ranges.*

156

157 (2) *Competition within and between species causes species to replace*  
158 *each other along environmental gradients: Increasing intraspecific*  
159 *competition will have a greater negative effect on fitness than*

160 interspecific competition for a given species within cages transplanted  
161 into the elevational range where that species has the highest relative  
162 abundance (high elevation for *D. birchii*; low elevation for *D.*  
163 *bunnanda*). By contrast, increasing interspecific competition will have  
164 a greater effect than intraspecific competition within cages transplanted  
165 to elevations where the competitor species has higher relative  
166 abundance.

167

168 (3) *Selection on competitive ability at different elevations causes local*  
169 *adaptation within species: Drosophila birchii* reared from populations  
170 close to the transplant location will suffer lower reductions in fitness in  
171 response to increasing levels of competition than those reared from  
172 populations further away on the elevational gradient. At high elevation  
173 (where *D. birchii* is most abundant), intraspecific competition will be a  
174 stronger driver of fitness and therefore local adaptation. By contrast,  
175 local adaptation will be more strongly associated with interspecific  
176 competition at lower elevations, where *D. birchii* is outnumbered by the  
177 competitor species (*D. bunnanda*), and intraspecific interactions are  
178 relatively rare.

179

180

181

## 182 **Methods**

183

### 184 ***Study species***

185

186 *Drosophila birchii* and *D. bunnanda* (Diptera: Drosophilidae) are both confined  
187 to tropical rainforest habitat, with distributions that overlap at lower latitudes

188 and elevations. They are closely related, similar in size and likely to target  
189 similar food and oviposition resources at sites where they co-occur. They do  
190 not hybridise in the laboratory (personal observation), and there is no  
191 evidence for hybridisation in the wild. *Drosophila birchii* has a broader  
192 latitudinal range than *D. bunnanda* (van Heerwaarden et al. 2009), and a  
193 broader elevational range within latitudes, with *D. bunnanda* confined to  
194 warmer sites at low latitudes and elevations. At the sites sampled for this  
195 study, *D. bunnanda* typically outnumbers *D. birchii* ~3:1 in field traps below  
196 100m elevation, then it declines in abundance at higher elevations. The two  
197 species have roughly equal abundance ~400m asl, and *D. bunnanda* is  
198 virtually absent above 500m asl, where abundance of *D. birchii* increases,  
199 reaching its maximum around 900m asl (Figure 1; Bridle et al. 2009; O'Brien  
200 et al. 2017).

201  
202  
203  
204

#### **Source of flies used in field transplant experiment**

205 In April 2016, we established 80 *D. birchii* isofemale lines from field-mated  
206 females collected at two high elevation (~900m above sea level (a.s.l.)) and  
207 two low elevation (<100m a.s.l.) sites at each of two gradients separated by  
208 ~300 km of latitude: Paluma (19°00' S, 146°14' E) and Mt Lewis (16°35' S,  
209 145°19' E)(Eight sites in total). Each isofemale line was founded by a single,  
210 field-mated female. These ten *D. birchii* isofemale lines per site were  
211 maintained in the laboratory for 10 months (~20 generations). Two  
212 generations before establishment of the cage transplant experiment, we  
213 mixed lines from the same site together to create eight mass-bred *D. birchii*  
214 populations (Supplementary Note 1).



215

216 We established isofemale lines of the competitor species, *D. bunnanda*, using  
217 the same method as for *D. birchii*. However, because *D. bunnanda* is absent  
218 above 500m, these lines all came from low elevation sites at each of the two  
219 gradients where *D. birchii* was collected. We maintained five *D. bunnanda*  
220 lines from each of Paluma and Mt Lewis (10 *D. bunnanda* lines in total) in the  
221 laboratory over the same period and under the same conditions as for the *D.*  
222 *birchii* lines. We then combined them all to establish a single mass bred  
223 population of *D. bunnanda* (Supplementary Note 1).

224

225 All isofemale lines and mass-bred populations were maintained at 23 °C on a  
226 12:12hr light:dark cycle prior to establishment of the field experiment.

227

228

### 229 ***Establishment of field transplant experiment***

230

231 Two generations after mixing, we separated emergers from mass-bred  
232 populations by sex under light CO<sub>2</sub> anaesthesia within 24 hours of emergence  
233 every day over seven days, and held them in single-sex vials (maximum  
234 density 10 flies). This ensured they were unmated at the start of the  
235 experiment, and that all courtship and mating occurred within field cages. We  
236 kept them in single-sex vials for a minimum of 72 hours to recover from the  
237 effects of CO<sub>2</sub> before transplant into field cages. The long collection period  
238 was necessary to obtain sufficient numbers of flies but meant that  
239 experimental flies varied in age from 3 – 10 days when they were put in field  
240 vials. To avoid confounding effects of such variation in age, we mixed

241 emergees from different emergence days within each population prior to  
242 establishment of field vials.

243  
244  
245 We transplanted all populations of *D. birchii* and *D. bunnanda* in vials along  
246 one of the field elevation gradients where flies were sourced (Paluma). The  
247 two gradients from which the original lines were collected have very similar  
248 ranges of abiotic conditions (temperature and humidity), which change in the  
249 same way with increasing elevation (O'Brien *et al.* 2017). We established  
250 transplant cages at three elevations ('sites'): Low (80m above sea level  
251 (a.s.l.)), Mid (450m a.s.l.) and High (900m a.s.l.). The low and high transplant  
252 sites included the sites from which the Paluma isofemale lines were sourced.

253 To account for localised environmental heterogeneity within each elevation,  
254 we divided each site into five sub-sites ('blocks') of roughly equal size, giving  
255 15 blocks in total. Details on variation in the abiotic environment along the  
256 gradient are provided in Supplementary Note 2 and Figure S1.

257  
258  
259 We transplanted flies in 30 ml plastic vials containing 5 ml of standard  
260 *Drosophila media*. Vials were closed with a square of muslin secured with a  
261 rubber band, which prevented flies from getting in or out, but allowed free air  
262 exchange with the outside, meaning conditions inside the vials tracked  
263 external temperature. We placed vials in holders constructed from 600 ml  
264 plastic bottles with two 135 x 95 mm windows cut out of the sides, ensuring  
265 maximal flow of air around the vial openings. We placed between two and  
266 four food vials in each bottle and hung bottles from tree branches at a height  
267 1.3 – 1.8 m above the ground. We suspended a 26cm plastic plate upside

268 down on the twine above each bottle to protect vials from rain and encased  
269 each bottle in strong wire mesh (20mm square holes) to prevent damage by  
270 vertebrates (particularly birds and small mammals).

271

272 We transplanted 19 656 virgin flies (11 808 *D. birchii* and 7 848 *D. bunnanda*)  
273 in 972 vials at a range of intraspecific and interspecific densities (see  
274 ‘competition treatments’ below) into the three transplant elevations in May  
275 2017. We placed flies in vials less than 24 hours before they were installed in  
276 the field and left them in vials at their respective transplant sites for 10 days.  
277 Therefore, virtually all courtship, mating and egg-laying happened under field  
278 conditions. After 10 days, we removed and discarded any surviving flies, and  
279 left vials in the field until emergence began. This was 14 days after the  
280 establishment of vials at low elevation, 17 days at mid elevation, and 21 days  
281 at high elevation. On the day that the first emergence was observed, all vials  
282 at that transplant elevation were removed and taken to the laboratory to  
283 enable daily emergence to be recorded accurately. Vials were held in a  
284 constant temperature room set to the same mean temperature as the  
285 elevation at which they had been transplanted, determined using data from  
286 the dataloggers inside cages at that site (Supplementary Note 2; Figure S1),  
287 on a 12:12 hr light:dark cycle at 60% relative humidity (RH). At all transplant  
288 blocks, virtually all larvae had pupated by the time vials were brought in from  
289 the field.

290

291 ***Competition treatments***

292 We used a response surface design (Inouye 2001), which independently  
293 varied the numbers of each species and enabled us to estimate the effects of  
294 intraspecific vs interspecific competition. We used 10 treatments, each  
295 defined by the number of *D. birchii* and *D. bunnanda* in a vial, with a total  
296 density of 6, 12, 24 or 48 flies (Figure 2). In a pilot study, we found that the  
297 average productivity of *D. birchii* declined with increasing intraspecific density  
298 across this range of densities (Supplementary Note 3; Figure S2),  
299 demonstrating that it was an appropriate range for detecting competition  
300 effects. We also verified that the size of flies emerging from each treatment  
301 lay within the size range of field-caught flies at the same elevation  
302 (Supplementary Note 4, Figure 3), implying that our competition treatments  
303 are ecologically realistic. We introduced equal numbers of unmated males  
304 and females (of each species, for mixed species treatments) into each vial,  
305 and transplanted five replicate vials of each Population x Treatment  
306 combination to each site (one replicate per block).

307

### 308 ***Measuring traits of flies emerging from field vials***

309 We removed and counted the number of emergees of each species and sex  
310 from each vial on the day emergence began at the transplant site, then daily  
311 for the next 10 days and then every three days for an additional nine days to  
312 capture any late emergence (20 days total from start of emergence). We  
313 undertook species identification and trait measurements blind with respect to  
314 treatment or transplant elevation. Male *D. birchii* and *D. bunnanda* were  
315 distinguished by their genital bristles (Schiffer & McEvey 2006). Females  
316 were identified based on differences in their pigmentation: the dark bands on

317 the dorsal abdomen are straight with sharp edges in *D. bunnanda*, whereas in  
318 *D. birchii* they rise in the centre and are more diffuse (M. Schiffer personal  
319 communication, and personal observation). For each species emerging from  
320 each vial, we recorded the number of male and female offspring emerging  
321 each day, to obtain values for the following: (1) productivity (total number of  
322 offspring per laying female), (2) offspring sex ratio (number of male offspring  
323 as a proportion of the total) for each vial, and (3) emergence time of each fly.  
324 We then mounted, photographed and landmarked the right wing of each fly to  
325 obtain a measure of (4) wing size, as a proxy for body size. Following the  
326 protocol described in Griffiths et al. (2005), we calculated wing centroid size  
327 by taking the square root of the sum of the squared distances between each  
328 of 10 wing landmarks and the wing centroid.

329

### 330 ***Data analysis***

331

332

#### 333 *Testing effects of competition and elevation on traits*

334

335

336 We fitted (generalized) linear mixed models to test for the effects of  
337 competition ('Intraspecific/Interspecific density': see Figure 2 for treatment  
338 combinations) and abiotic ('Elevation': low, mid or high) environmental  
339 variation on each trait. Separate models were fitted for each trait in each  
340 species. We applied a Bonferroni correction to adjust the significance level to  
341 account for multiple tests. In *D. birchii*, we additionally tested for an effect of  
342 the elevation from which the isofemale lines were originally sourced ('Source  
343 elevation': high or low), and its interactions with competition and transplant

344 elevation. All models were fitted using *lme4* (Bates *et al.* 2015), implemented  
345 in *R* v 3.4.2.

346

347 For productivity and sex ratio, where vial was the unit of analysis, we fitted  
348 models that included fixed effects of intraspecific density, interspecific density,  
349 transplant elevation, source elevation and all two-way interactions. We  
350 included source population as a random effect. For productivity, we square  
351 root transformed data to conform to assumptions of normality, and fitted linear  
352 mixed models with the factors described above. For offspring sex ratio, we  
353 fitted generalized linear models with a binomial distribution and a logit link  
354 function. For emergence time (day) and wing size (mm), which were  
355 measured on individual flies, we fitted models with the same fixed and random  
356 factors, but additionally included vial as a random effect. Both body size and  
357 development time typically differ between males and females in *Drosophila*  
358 species (e.g. Santos *et al.* 1994; Arthur *et al.* 2008), therefore separate  
359 models were fitted for each sex. Emergence time and wing size data were  
360 normally distributed and were left untransformed.

361

362 The significance of fixed and random effect terms in each model was  
363 assessed by comparing the log likelihood of a model with or without the  
364 relevant term using a chi-squared test. For several traits in both species, the  
365 effects of intraspecific and interspecific density varied with elevation (indicated  
366 by significant density x elevation terms; Table 1). To further explore the  
367 relative effect of intra- and interspecific density on traits within each elevation,  
368 we fitted separate linear mixed models for each transplant elevation (i.e. low,

369 mid and high), keeping the remaining fixed and random effects the same as in  
370 the full model. For each trait at each elevation, we assessed the relative  
371 importance of intraspecific vs interspecific competition in each species using  
372 the ratio of their partial regression coefficients,  $\beta_{\text{intraspecific}} : \beta_{\text{interspecific}}$  (Anderson  
373 & Whiteman 2015).

374

375 *Testing the power of competition to explain species' distributions*

376 We tested whether the observed effects of intra and interspecific competition  
377 on productivity can explain the relative distributions of *D. birchii* and *D.*  
378 *bunnanda* across the elevation gradient, by comparing predicted productivities  
379 with and without competition between the species. We considered three  
380 different scenarios: (1) no interspecific competition and constant intraspecific  
381 competition across the gradient, (2) no interspecific competition and  
382 intraspecific interactions at a frequency proportional to field observations of  
383 the abundance of each species, and (3) intraspecific and interspecific  
384 interactions at frequencies proportional to the field abundance of each  
385 species. For (1), we used the observed productivity of flies in single-species  
386 field vials at intermediate density (density = 12). For (2) and (3), we used our  
387 field abundance counts (Figure 1) as the starting values for each species'  
388 density (and hence estimates of the frequencies of intraspecific (2 and 3) and  
389 interspecific (3) interactions) at each elevation, and used the equations from  
390 our elevation-specific models to calculate the expected productivity of each  
391 species across the gradient at these densities. Note that because *D.*  
392 *bunnanda* was not found at the high elevation site (density = 0), using this as  
393 the starting value meant that the predicted abundance of this species

394 remained zero under each of these scenarios. To enable comparison of  
395 observed and predicted abundances under each scenario, we calculated  
396 abundances (observed or predicted) of each species at each site relative to  
397 the abundance of *D. birchii* at the low elevation site. That is, we set the  
398 abundance of *D. birchii* at the low elevation site to 1 and calculated the  
399 relative abundance of *D. birchii* at the other sites and *D. bunnanda* at all sites  
400 by dividing their observed or predicted abundances by that of *D. birchii* at the  
401 low elevation site.

402

#### 403 *Testing for local adaptation*

404 For *D. birchii*, where we transplanted populations from extreme ends of the  
405 species' elevational range, we were able to test for adaptation to the local  
406 abiotic or competitive environment. Local adaptation would be revealed by  
407 higher fitness of populations in their 'local' environment compared with their  
408 fitness in other environments ('home' vs 'away'), and/or by higher fitness of  
409 local populations than those transplanted from elsewhere in the species'  
410 range ('local' vs 'non-local')(Kawecki & Ebert 2004). Either of these should  
411 result in a source population x transplant environment interaction for fitness.  
412 We therefore examined the following interactions in the full models for each  
413 trait to test for local adaptation: (i) the 'Elevation x Source elevation'  
414 interaction to test for local adaptation to the abiotic environment (averaged  
415 across all competition treatments); (ii) the 'Intraspecific density x Source  
416 elevation' and 'Interspecific density x Source elevation' interactions to test for  
417 adaptation to the local intraspecific and interspecific competitive environments  
418 respectively (averaged across transplant elevations and the other form of



419 competition). Furthermore, because abiotic and biotic environmental factors  
420 may combine to drive adaptive divergence (if, for example, divergence in  
421 competitive ability depends upon the abiotic environment in which it is  
422 measured), we examined how Intraspecific/Interspecific density x Source  
423 elevation interactions varied across the three transplant elevations. We did  
424 not have enough statistical power to detect significant three-way interactions  
425 in our full model (i.e. Intraspecific/Interspecific density x Elevation x Source  
426 elevation). We therefore used the elevation-specific models and examined:  
427 (iii) Intraspecific density x Source elevation and Interspecific density x Source  
428 elevation interactions to test for divergence among source populations in their  
429 responses to intraspecific and interspecific competition respectively within  
430 each transplant elevation. Wherever one of the interactions described above  
431 was significant (after Bonferroni correction for multiple comparisons), we  
432 examined the pattern of fitness variation to determine whether it was  
433 consistent with local adaptation (i.e. superior performance of the 'home' or  
434 'local' population).

435

436 The traits we considered when testing for local adaptation were (i) productivity  
437 (since this may be considered a direct measure of fitness) and (ii) wing size,  
438 as a proxy for body size, which in *Drosophila* is positively correlated with a  
439 range of fitness measures including longevity, female fecundity and male  
440 mating success (e.g. Partridge & Farquhar 1983; Santos et al. 1992; McCabe  
441 & Partridge 1997).

442

443

444

445

446

447

## Results

448

449

450 **(1) Fitness effects of competition are strongest at the warm edge of the**

451 **species' ranges**

452

453 There was a strong effect of elevation on the overall productivity of both

454 species (Table 1), consistent in direction and magnitude with that observed in

455 *D. birchii* in O'Brien et al. (2017). Mean productivity (averaged across all

456 density treatments) was highest in field cages at the warmest, low elevation

457 site (*D. birchii* offspring per female mean  $\pm$  SD =  $5.52 \pm 5.25$ ; *D. bunnanda*

458 mean  $\pm$  SD =  $3.44 \pm 2.69$ ; Table S2) and declined with elevation, so that at

459 the high elevation site mean productivity was 24.5% and 27% of that at the

460 low elevation site in *D. birchii* and *D. bunnanda* respectively (*D. birchii*

461 offspring per female mean  $\pm$  SD =  $1.35 \pm 2.02$ ; *D. bunnanda* mean  $\pm$  SD =

462  $0.93 \pm 1.05$ ; Table S2).

463

464 Emergence time and wing size also varied with transplant elevation (Table 1),

465 with flies of both sexes and species emerging later and at a larger size at

466 higher elevations (Figure 3; Table S2). In *D. birchii*, emergence from cages at

467 the high elevation site was, on average, 9.6 days (males) and 10.4 days

468 (females) later than at the low elevation site (increases of 37.2% and 41.6%

469 respectively; Table S2). In *D. bunnanda*, mean emergence times for males

470 and females respectively increased by 11.7 days (46.4%) and 10.8 days

471 (42.5%) from the low to the high elevation site (Table S2). The mean wing

472 size of *D. birchii* emerging at the high elevation site was 11.0% (males) and

473 9.7% (females) greater than those emerging at the low elevation site (Table

474 S2). In *D. bunnanda*, these increases were 9.9% and 8.5% for males and  
475 females respectively (Table S2). We did not detect an effect of elevation on  
476 the sex ratio of offspring of either species (Table 1).

477

478 Both intra and interspecific competition greatly reduced the productivity of  
479 both species (Table 1; Figure 3) at all transplant elevations (Table 2). The  
480 strength of this effect varied with elevation (note the significant interactions of  
481 intra and interspecific density x elevation on productivity of *D. birchii*, and  
482 intraspecific density x elevation in *D. bunnanda*; Table 1). In both species, the  
483 reduction in productivity in response to intraspecific and interspecific  
484 competition was greatest at the low elevation transplant site, with weaker  
485 effects of both forms of competition at the mid and high elevation sites. In *D.*  
486 *birchii*, the reduction in productivity with each additional competitor of the  
487 same species (intraspecific competition;  $\beta_{\text{Intraspecific}}$ ) or of the other species  
488 (interspecific competition;  $\beta_{\text{Interspecific}}$ ) was, respectively, 1.6 and 1.8 times  
489 greater at the low elevation site than at the high elevation site. In *D.*  
490 *bunnanda*,  $\beta_{\text{Intraspecific}}$  and  $\beta_{\text{Interspecific}}$  were, respectively, 1.8 and 1.2 times  
491 greater at the low than the high elevation site (Table 2; Figure 3).

492

493 There were also strong effects of competition on emergence time and wing  
494 size of both species (Table 1). Increasing intensities of intra and interspecific  
495 competition resulted in smaller flies that emerged earlier (Figure 3). In  
496 contrast to productivity however, the size of the effect of intra and interspecific  
497 competition on these traits did not vary with elevation (note lack of significant  
498 interactions of intra and interspecific competition with elevation; Table 1).

499

500 Effects of competition on offspring sex ratio varied between the species and  
501 according to the type of competition and were evident only at the low  
502 elevation site (Table 2). In *D. birchii*, there was a small but significant  
503 increase in the proportion of male offspring emerging as a function of the  
504 intensity of interspecific competition at the low elevation site. The mean sex  
505 ratio ranged from slightly female-biased (mean prop males  $\pm$  SD =  $0.46 \pm$   
506  $0.02$ ) in field cages where *D. bunnanda* was absent (i.e. no interspecific  
507 competition) to slightly male-biased (mean  $\pm$  SD =  $0.54 \pm 0.02$ ) in mixed-  
508 species cages (Table S2). However, there was no effect of intraspecific  
509 competition on sex ratio (Table 1). By contrast, in *D. bunnanda*, we found the  
510 opposite: intraspecific competition, but not interspecific competition, increased  
511 the proportion of male offspring at the low elevation site (Table 2; Table S2).  
512 While the sex ratio of *D. bunnanda* offspring was female-biased in nearly all  
513 density treatments at this site (mean prop males  $\pm$  SD =  $0.4 \pm 0.18$ ), it ranged  
514 from mean  $\pm$  SD =  $0.35 \pm 0.07$  at the lowest intraspecific density to  $0.46 \pm$   
515  $0.02$  at the highest intraspecific density (Table S2).

516

517

518

519 **(2) Competition within and between species causes species to replace**  
520 **each other along environmental gradients**

521

522 *Effects of intra and interspecific competition on fitness:* In *D. birchii*,  
523 interspecific competition had a stronger effect in reducing productivity than  
524 intraspecific competition at the low and mid elevation sites (ratios of  
525 intraspecific to interspecific density coefficients ( $\beta_{\text{Intraspecific}}/\beta_{\text{Interspecific}}$ ) are less  
526 than one; Table 2), where *D. bunnanda* is most abundant (Figure 1). By

527 contrast, at the high elevation site (where *D. birchii* is most abundant and *D.*  
528 *bunnanda* is absent), the negative effects of both forms of competition on  
529 productivity were equal ( $\beta_{\text{Intraspecific}}/\beta_{\text{Interspecific}} = 1$ ; Table 2).

530

531 Similarly, in *D. bunnanda*, intraspecific competition reduced productivity more  
532 strongly than interspecific competition at the low and mid elevation sites  
533 ( $\beta_{\text{Intraspecific}}/\beta_{\text{Interspecific}} > 1$ ; Table 2) where intraspecific interactions are most  
534 frequent in this species, whereas interspecific competition had a stronger  
535 effect in cages at the high elevation transplant site ( $\beta_{\text{Intraspecific}}/\beta_{\text{Interspecific}} < 1$ ;  
536 Table 2) where this species is not normally found.

537

538 By contrast, the relative effects of intraspecific vs interspecific competition on  
539 other traits of the offspring in the cages (sex ratio, emergence time, wing size)  
540 did not show consistent contrasts in effect between the centre and edge of  
541 each species' elevational limits (Table 2).

542

543

544 *Testing the power of competition to explain species' distributions*

545 Using the likely frequencies of intraspecific and interspecific interactions at  
546 field sites, and the fitness effects of such intensities of interaction within cages  
547 to predict species' relative abundances at each site resulted in predictions that  
548 were closer to observed field abundances than predictions made assuming no  
549 interspecific competition (Figure S3). Using the productivity of each species  
550 in single-species vials to predict field relative abundance gave very misleading  
551 results: in particular, it predicted a higher abundance of *D. birchii* (compared  
552 to *D. bunnanda*) at the low elevation site and a higher abundance of *D.*  
553 *bunnanda* at the high elevation site (Figure S3B), which is the reverse of what

554 is observed in these ecological communities (Figure 1, Figure S3A).  
555 Predictions were significantly improved by assuming intraspecific interactions  
556 at a frequency proportional to observed field abundances (Figure S3C), and  
557 further by also assuming interspecific interactions occurred at field  
558 frequencies (Figure S3D). However, both of these approaches still predicted  
559 similar abundances of *D. birchii* at low and high elevations, whereas field  
560 observations show much higher abundance of this species at high than at low  
561 elevation sites (Figure 1; Figure S3A).

562

563

564 **(3) Selection on competitive ability drives local adaptation within**  
565 **species within a limited part of the elevational range**

566

567 Evidence for adaptive divergence between high and low elevation source  
568 populations of *D. birchii* was limited. Source elevations did not show overall  
569 differences in their trait means (no significant effect of Source elevation; Table  
570 1), nor in their fitness responses to the abiotic or competitive environment  
571 (Elevation x Source elevation and Intraspecific/Interspecific density x Source  
572 elevation interactions were not significant for productivity or body size; Table  
573 1).

574

575 High and low elevation source populations of *D. birchii* did differ in the effect  
576 of intraspecific competition on wing size, but only at the high elevation  
577 transplant site (see Intraspecific density x Source elevation interactions in  
578 Table S1; Figure 4). At this site, the reduction in size of male offspring from  
579 low elevation source populations as a function of intraspecific density  
580 ( $\beta_{\text{Intraspecific}} \pm \text{SE} = -0.006 \pm 0.002$ ;  $P = 1.95 \times 10^{-4}$ ) was three times greater

581 than that of offspring from high elevation source populations ( $\beta_{\text{Intraspecific}} \pm \text{SE} =$   
582  $-0.002 \pm 0.001$ ;  $P = 0.114$ ) (Table S1; Figure 4), suggesting local adaptation  
583 in competitive ability at high vs low elevation, in terms of its effects on body  
584 size, at the site where natural density (and therefore intensity of intraspecific  
585 interactions) was highest. In females emerging at this site, the difference was  
586 even more striking: Intraspecific density reduced mean wing size of female *D.*  
587 *birchii* from low elevation source populations ( $\beta_{\text{Intraspecific}} \pm \text{SE} = -0.009 \pm$   
588  $0.002$ ;  $P = 5.52 \times 10^{-6}$ ) by nine times as much as it did wing size of high  
589 elevation source populations ( $\beta_{\text{Intraspecific}} \pm \text{SE} = -0.001 \pm 0.002$ ;  $P = 0.439$ )  
590 (Table S1; Figure 4). Source elevations did not differ in their fitness  
591 responses to interspecific competition at any of the transplant elevations  
592 (Table S1).

593  
594  
595

596  
597  
598

## Discussion

599 ***Competition reduces fitness more at the warm margin of species'***  
600 ***ranges***

601 Biotic interactions are thought to be a more important determinant of fitness,  
602 and therefore species' range limits, at lower latitudes (e.g. Coley & Barone  
603 1996; Schemske et al 2009) and elevations (e.g. Davis et al. 1998; Pearson &  
604 Dawson 2003). However, tests of this hypothesis have yielded inconsistent  
605 results (Moles & Ollerton 2016; Grant et al. 2018). Our results suggest that  
606 competitive interactions limit population growth more at the low elevation  
607 (warm) edge of the ranges of *D. birchii* and *D. bunnanda*, than at their high

608 elevational limits. The low elevation site also had the highest mean  
609 productivity overall. Therefore, for a given interaction density (here  
610 determined by varying the number of flies introduced to a cage), larval  
611 competition was greatest at the low elevation site, meaning food resources  
612 would be depleted more rapidly.

613

614 The large reductions in productivity as intra and interspecific competition is  
615 increased in cages transplanted to the low elevation site will be compounded  
616 by the increased proportions of male offspring at these sites, which will reduce  
617 future population growth rate, and therefore evolutionary potential at this  
618 range margin (Bridle et al. 2019). Although the effects on sex ratio were  
619 subtle, the most prevalent competitive interactions at this site (interspecific for  
620 *D. birchii*; intraspecific for *D. bunnanda*) both increased the proportion of  
621 offspring that were male. Males are smaller than females in both of these  
622 species (Figure 3), and presumably less costly to produce. Therefore,  
623 skewing the sex ratio towards males when faced with competitive stress may  
624 be a strategy for maximising the number and fitness of offspring produced,  
625 consistent with optimal sex allocation theory (Trivers & Willard 1973). It has  
626 been shown that female *Drosophila melanogaster* can adjust the sex ratio of  
627 their offspring in response to the age of their mate (Mange 1970; Long &  
628 Pischedda 2005), and that this may be adaptive. It is not known whether *D.*  
629 *birchii* and *D. bunnanda* are also able to actively manipulate the sex ratio of  
630 their offspring, or whether the effect on sex ratio we observe is due to higher  
631 survival of male offspring during development. This will be explored further in  
632 a future study.



633

634 ***Competition shapes the relative distributions of D. birchii and D.***

635 ***bunnanda***

636 The extent to which competitive interactions shape species' distributions, and  
637 under what conditions, is a longstanding question in ecology (e.g. Wisz et al.  
638 2013; Godsoe et al. 2015). Our results demonstrate that both the abiotic  
639 environment and the intensity of intra and interspecific competition determine  
640 the fitness of *Drosophila birchii* and *D. bunnanda* transplanted in cages across  
641 their entire elevational ranges. The effects of competition intensity on  
642 productivity in cages varied across the elevation gradient in ways that were  
643 consistent with the species' relative distributions, and with the predictions of  
644 the "Tangled Bank" theory of community assembly (REF): each species  
645 suffers a greater loss of fitness (productivity) due to intraspecific competition  
646 within the centre of its range, and due to interspecific competition at its  
647 ecological margins, where the competitor species is more abundant in nature.

648

649 We used the site-specific intra and interspecific competition effects estimated  
650 from our field transplant experiments to predict relative abundance of *D.*  
651 *birchii* and *D. bunnanda* along the gradient to test for evidence that  
652 competitive interactions limit the distributions of these species. Including both  
653 types of competition resulted in predicted relative abundances that much  
654 more closely matched observed abundance in the field, particularly when  
655 compared with predictions made assuming constant intraspecific competition  
656 and no interspecific competition (Figure S3). This is consistent with  
657 conclusions from a previous transplant study in *D. birchii* that the abiotic

658 environment alone cannot explain its elevational distribution, and that biotic  
659 interactions are an important limit to population growth, particularly at low  
660 elevations (O'Brien et al. 2017). However, our best predictions still over-  
661 estimated the relative abundance of *D. birchii* at the low and mid elevation  
662 sites, suggesting that additional factors are required to explain the lower  
663 range limit of this species, potentially including other competitors, availability  
664 of food resources, pathogens and parasitoids. It is for example known that  
665 rates of parasitism by parasitoid wasps on *Drosophila* species in these  
666 communities increase at lower elevations (Jefferies et al. 2020), and the effect of  
667 this on fitness is being assessed in ongoing work.

668

669

670 ***Evidence for local adaptation is strongly dependent on the abiotic and***  
671 ***competitive environment***

672 Despite the very large fitness effects of the abiotic and competitive  
673 environments tested in these transplant experiments, evidence for local  
674 adaptation in *D. birchii* along the elevational gradient could only be detected  
675 under a limited set of abiotic and biotic conditions. Increasing within-species  
676 (intraspecific) competition in cages had a negative effect on productivity and  
677 wing size of *D. birchii* at all transplant elevations. However, at the high  
678 elevation transplant site, the effect on wing size varied according to the  
679 elevation from which isofemale lines had been sourced, with flies from low  
680 elevation source populations showing a much greater (3x in males and 9x in  
681 females) reduction in mean wing size than high elevation flies in response to  
682 increasing intraspecific competition. Given that the natural abundance of *D.*

683 *birchii* increases with elevation, this result is consistent with local adaptation of  
684 high elevation flies to higher intraspecific density (e.g. by the evolution of  
685 increased efficiency at extracting nutrient resources in the presence of  
686 conspecifics). In female *Drosophila melanogaster*, large body size has been  
687 shown to be strongly predictive of fitness (survival and lifetime productivity),  
688 but only when tested under cool (not warm) conditions (McCabe & Partridge  
689 1997). If the same is true in *D. birchii*, selection may favour the maintenance  
690 of large body size at the cool edge of the range, even in the presence of high  
691 intraspecific competition.

692

693 In a study of damselflies, Siepielski et al. (2016) also found that source  
694 populations differed in their susceptibility to the negative effects of  
695 intraspecific density. In contrast to our result, they observed that populations  
696 transplanted to their local site showed more, not less, reduction in fitness in  
697 response to intraspecific competition. They attribute this to local populations  
698 being better adapted to the abiotic environment at the transplant site and  
699 therefore more productive, which exacerbated the intensity of competition  
700 (Siepielski et al. 2016). However, in our study we did not find any difference  
701 in mean productivity of populations from elevational extremes.

702

703 Detecting local adaptation in *D. birchii* is therefore strongly dependent on both  
704 the abiotic and biotic environment in which it is measured. This likely explains  
705 why neither population divergence nor local adaptation was detected in a  
706 previous experiment where *D. birchii* sourced from the same elevational range  
707 was transplanted at very low density (O'Brien et al. 2017). Our finding that

708 intraspecific competition can strongly affect the likelihood of detecting  
709 population divergence (and possible local adaptation) contrasts with that of  
710 Hargreaves et al. (2020), who found in a meta-analysis that maintaining biotic  
711 interactions in field transplant experiments did not increase the likelihood or  
712 strength of local adaptation detected, compared with studies where biotic  
713 interactions were excluded. However, it may be that variation among sites in  
714 the extent to which biotic interactions reveal local adaptation, such as we  
715 observed here, means that such effects are not detectable when averaged  
716 over a wide range of environments.

717

718 Some of the most compelling evidence for effects of biotic interactions on  
719 adaptation comes from experimental evolution studies of microbial  
720 communities (e.g. Lawrence et al. 2012; Fiegna et al. 2015; Jousset et al.  
721 2016; Hall et al. 2018; Scheuerl et al. 2020). Such studies have shown that  
722 competitive interactions can constrain adaptive responses to the abiotic  
723 environment (e.g. Hall et al. 2018) and that individual species evolve at a  
724 slower rate when they are maintained in diverse communities than when  
725 evolved alone (Fiegna et al. 2015; Scheuerl et al. 2020). This may be  
726 because negative biotic interactions such as competition reduce population  
727 sizes and therefore evolutionary potential, or due to trade-offs between  
728 adaptation to multiple interacting species or between biotic and abiotic  
729 adaptation (Barraclough 2015). It is not yet known whether the tendency for  
730 species interactions to reduce evolutionary responses generalises to  
731 communities of other types of organisms, but if it does, we would expect local  
732 adaptation to be weaker at low latitudes and elevations, where species

733 diversity is typically higher (e.g. Rahbek 1995; Hillebrand 2004; Schemske et  
734 al 2009). The greater population divergence of *D. birchii* in response to  
735 competition at the high elevation site (compared with the low elevation site)  
736 appears to support this pattern.

737

738

### 739 **Conclusions**

740

741 Using a novel field transplant design, we assessed the fitness effects of  
742 competitive interactions between two species of tropical rainforest *Drosophila*  
743 (*D. birchii* and *D. bunnanda*) at sites along an elevation gradient spanning the  
744 full climatic extent of their distributions. Consistent with expectations from  
745 patterns of biodiversity along elevational and latitudinal gradients, we found  
746 that fitness effects of both intra and interspecific competition increased  
747 towards the warm, low elevation range margin in both species. In each  
748 species, intraspecific competition reduced fitness more than interspecific  
749 competition at the centre of the species' distribution, whereas the reverse was  
750 true at the margins where the competitor species becomes more abundant,  
751 consistent with adaptation to the abiotic environment inhabited by each  
752 species. We also detected adaptation to the local competitive environment  
753 within *D. birchii*, the more widespread species, but only at the high elevation  
754 (cold) end of its distribution, suggesting evolutionary responses are contingent  
755 upon both the abiotic and biotic environment. Our findings highlight the  
756 importance of considering biotic interactions when investigating limits to  
757 species' distributions and predicting ecological and evolutionary responses to  
758 environmental change. This will be particularly important with climate change,  
759 which is expected to have profound effects not just on the abiotic environment

760 but on community composition, and therefore the type and frequency of  
761 interactions between organisms (Lurgi et al. 2012).

762  
763 Word count: 6995

764  
765

## 766 **Acknowledgements**

767

768 Thank you to Marcus Lee and Giovanni Bianco for assistance with running the  
769 field transplant experiment, and to Jenny Cocciardi and Rebecca Moss for  
770 maintaining the *Drosophila* isofemale lines. For assistance with mounting,  
771 photographing and landmarking wings, we would like to thank: Katie Andrews,  
772 Sasha Anisman, Eliane Belben, Hannah Bray, Guy Burstein, Jack Challice,  
773 Amber-Rose Cooper, Lydia Davies, Peter Dobra, Jessie Fernando, Gemma  
774 Glasscock, Dunia Gonzales, Vilhelmiina Haavisto, Sophie Harding, Maxwell  
775 James, Bertie Loyd, Cameron Matthews, Harry New, Catherine Rawlinson,  
776 Kate Rylands, Mina Sheppard, Nathan Williams, Victoria Williams and Ella  
777 Wright. This work was funded by NERC standard grant NE/N010221/1. JH  
778 was supported by Czech Science Foundation grant no. 17-27184Y.

779

780

## 781 **References**

782

783 Anderson, T.L. & Whiteman, H.H. (2015). Asymmetric effects of intra- and  
784 interspecific competition on a pond-breeding salamander. *Ecology*, 96,  
785 1681 – 1690.

786

787 Arthur, A.L., Weeks, A.R. & Sgro, C.M. (2008). Investigating latitudinal clines for  
788 life history and stress resistance traits in *Drosophila simulans* from  
789 eastern Australia. *Journal of Evolutionary Biology*, 21, 1470 - 1479.

790

791 Barraclough, T.G. (2015). How do species interactions affect evolutionary  
792 dynamics across whole communities? *Annual Review of Ecology, Evolution*  
793 *and Systematics* 46, 25 - 48.

794

795 Bates, D., Machler, M., Bolker, B.M. & Walker, S.C. (2015). Fitting Linear Mixed-  
796 Effects Models Using lme4. *Journal of Statistical Software*, 67, 1 - 48.

797

798

799 Bischoff, A., Crémieux, L., Smilauerova, M., Lawson, C.S., Mortimer, S.R., Dolezal, J.,  
800 Lanta, V., Edwards, A.R., Brook, A.J., Macel, M., Leps, J., Steinger, T. &  
801 Müller-Schärer, H. (2006). Detecting local adaptation in widespread  
802 grassland species -the importance of scale and local plant community.  
803 *Journal of Ecology*, 94, 1130 - 1142.

804

805 Bridle, J.R., Gavaz, S. & Kennington, W.J. (2009). Testing limits to adaptation  
806 along altitudinal gradients in rainforest *Drosophila*. *Proceedings of the*  
807 *Royal Society B: Biological Sciences*, 276, 1507 - 1515.

- 808  
809 Bridle, J.R., Kawata, M. & Butlin, R.K. (2019). Local adaptation stops where  
810 ecological gradients steepen or are interrupted. *Evolutionary*  
811 *Applications*, 12, 1449 - 1462.  
812
- 813 Coley, P.D. & Barone, J.A. (1996). Herbivory and plant defenses in tropical  
814 forests. *Annual Review of Ecology and Systematics*, 27, 305 - 335  
815
- 816 Darwin, C.R. (1859). On the origins of species by means of natural selection, or  
817 the preservation of favoured races in the struggle for life. John Murray,  
818 London UK  
819
- 820 Davis, A.J., Jenkinson, L.S., Lawton, J.H., Shorrocks, B. & Wood, S. (1998). Making  
821 mistakes when predicting shifts in species range in response to global  
822 warming. *Nature*, 391, 783 - 786.  
823
- 824 Fiegna, F., Scheuerl, T., Moreno-Letelier, A., Bell, T. & Barraclough, T.G. (2015).  
825 Saturating effects of species diversity on life-history evolution in bacteria.  
826 *Proceedings of the Royal Society of London B.*, 282, 20151794.  
827  
828
- 829 Godsoe, W., Murray, R. & Plank, M.J. (2015). The effect of competition on species'  
830 distributions depends on coexistence, rather than scale alone. *Ecography*  
831 38, 1071 - 1079.  
832
- 833 Godsoe, W., Franklin, J. & Blanchet, F.G. (2017). Effects of biotic interactions on  
834 modeled species' distribution can be masked by environmental gradients.  
835 *Ecology and Evolution*, 7, 654 - 664.  
836
- 837 Grant, E.H.C., Brand, A.B., De Wekker, S.F.J., Lee, T.R. & Wofford, J.E.B. (2018).  
838 Evidence that climate sets the lower elevation range limit in a high-  
839 elevation endemic salamander. *Ecology and Evolution*, 8, 7553 - 7562.  
840
- 841 Griffiths, J.A., Schiffer, M. & Hofmann, A.A. (2005). Clinal variation and laboratory  
842 adaptation in the rainforest species *Drosophila birchii* for stress  
843 resistance, wing size, wing shape and development time. *Journal of*  
844 *Evolutionary Biology*, 18, 213 - 222.  
845
- 846 Hall, J.P.J., Harrison, E. & Brockhurst, M.A. (2018). Competitive species  
847 interactions constrain abiotic adaptation in a bacterial soil community.  
848 *Evolution Letters*, 2, 580 - 589.  
849
- 850 Hargreaves, A.L., Germain, R.M., Bontrager, M., Persi, J. & Angert, A.L. (2020).  
851 Local adaptation to biotic interactions: a meta-analysis across latitudes.  
852 *The American Naturalist* 195, 395 - 411.  
853
- 854 Inouye, B.D. (2001). Response surface experimental designs for investigating  
855 interspecific competition. *Ecology*, 82, 2696 - 2706.  
856

- 857 Jeffs, C.T., Terry, J.C.D., Higgie, M., Jandová, A., Konvičková, H., Brown, J.J., Lue,  
858 C-H., Schiffer, M., O'Brien, E.K., Bridle, J.R., Hřeček, J. & Lewis, O.T.  
859 (2020). Molecular analyses reveal consistent food web structure with  
860 elevation in rainforest *Drosophila*-parasitoid communities. *BioRxiv* DOI:  
861 <https://doi.org/10.1101/2020.07.21.213678>.  
862
- 863 Jousset, A., Eisenhauer, N., Merker, M., Mouquet, N. & Scheu, S. (2016). High  
864 functional diversity stimulates diversification in experimental microbial  
865 communities. *Science Advances*, 2, e1600124.  
866
- 867 Kawecki, T.J. & Ebert, D. (2004). Conceptual issues in local adaptation. *Ecology*  
868 *Letters*, 7, 1225 - 1241.  
869
- 870 Körner, C. (2007). The use of 'altitude' in ecological research. *Trends in Ecology*  
871 *& Evolution*, 22, 569 - 574.  
872
- 873 Lawrence, D., Fiegna, F., Behrends, V., Bundy, J.G., Phillimore, A.B., Bell, T. &  
874 Barraclough, T.G. (2012). Species interactions alter evolutionary  
875 responses to a novel environment. *PLOS Biology*, 10, e1001330.  
876
- 877 Long, T.A.F. & Pischedda, A. (2005). Do female *Drosophila melanogaster*  
878 adaptively bias offspring sex ratios in relation to the age of their mate?  
879 *Proceedings of the Royal Society B: Biological Sciences*, 272, 1781 - 1787.  
880
- 881 Lurgi, M., López, B.C. & Montoya, J.M. (2012). Novel communities from climate  
882 change. *Philosophical Transactions of the Royal Society B*, 367, 2913 -  
883 2922.  
884
- 885 Mange, A.P. (1970). Possible nonrandom utilization of X- and Y-bearing sperm in  
886 *Drosophila melanogaster*. *Genetics*, 65, 95 - 106.  
887
- 888 McCabe, J. & Partridge, L. (1997). An interaction between environmental  
889 temperature and genetic variation for body size for the fitness of adult  
890 female *Drosophila melanogaster*. *Evolution*, 51, 1164 - 1174.  
891
- 892 Moles, A.T. & Ollerton, J. (2016). Is the notion that species interactions are  
893 stronger and more specialized in the tropics a zombie idea? *Biotropica*,  
894 48, 141 - 145.  
895
- 896 Morris, R.J., Sinclair, F.H. & Burwell, C.J. (2015). Food web structure changes  
897 with elevation but not rainforest stratum. *Ecography*, 38, 792 - 802.  
898  
899
- 900 O'Brien, E.K., Higgie, M., Reynolds, A., Hoffmann, A.A. & Bridle, J.R. (2017). Testing  
901 for local adaptation and evolutionary potential along altitudinal gradients  
902 in rainforest *Drosophila*: beyond laboratory estimates. *Global Change*  
903 *Biology*, 23, 1847 - 1860.  
904



- 905 Partridge, L. & Farquhar, M. (1983). Lifetime mating success of male fruitflies  
906 (*Drosophila melanogaster*) is related to their size. *Animal Behaviour*, 31,  
907 871 - 877.  
908
- 909 Pearson, R.G. & Dawson, T.P. (2003). Predicting the impacts of climate change on  
910 the distribution of species: are bioclimate envelope models useful? *Global*  
911 *Ecology and Biogeography*, 12, 361 - 371.  
912
- 913 Poisot, T., Bever, J.D., Nemri, A., Thrall, P.H. & Hochberg, M.E. (2011). A  
914 conceptual framework for the evolution of ecological specialisation.  
915 *Ecology Letters*, 14, 841 - 851.  
916
- 917 Rahbek, C. (1995). The elevational gradient of species richness - a uniform  
918 pattern. *Ecography*, 18, 200 - 205.  
919
- 920 Rice, K.J. & Knapp, E.E. (2008). Effects of competition and life history stage on the  
921 expression of local adaptation in two native bunchgrasses. *Restoration*  
922 *Ecology*, 16, 12 - 23.  
923
- 924 Santos, M., Ruiz, A., Quezada-Diaz, J.E., Barbadilla, A. & Fontdevila, A. (1992). The  
925 evolutionary history of *Drosophila buzzatii*. XX. Positive phenotypic  
926 covariance between field adult fitness components and body size. *Journal*  
927 *of Evolutionary Biology*, 5, 403 - 422.  
928
- 929 Santos, M., Fowler, K. & Partridge, L. (1994). Gene-environment interaction for  
930 body size and larval density in *Drosophila melanogaster*: an investigation  
931 of effects on development time, thorax length and adult sex ratio.  
932 *Heredity*, 72, 515 - 521  
933
- 934 Schemske, D.W., Mittelbach, G.G., Cornell, H.V., Sobel, J.M. & Roy, K. (2009). Is  
935 there a latitudinal gradient in the importance of biotic interactions?  
936 *Annual Review of Ecology, Evolution, and Systematics*, 40, 245 - 269.  
937
- 938 Scheuerl, T., Hopkins, M., Nowell, R.W., Rivett, D.W., Barraclough, T.G. & Bell, T.  
939 (2020). Bacterial adaptation is constrained in complex communities.  
940 *Nature Communications*, 11, 1 - 8.  
941
- 942 Schiffer, M. & McEvey, S.F. (2006). *Drosophila bunnanda* - a new species from  
943 northern Australia with notes on other Australian members of the  
944 *montium* subgroup (Diptera:Drosophilidae). *Zootaxa*, 1333, 1-23.  
945
- 946 Stuart, Y.E., Campbell, T.S., Hohenlohe, P.A., Reynolds, R.G., Revell, L.J. & Losos,  
947 J.B. (2014). Rapid evolution of a native species following invasion by a  
948 congener. *Science*, 346, 463 - 466.  
949
- 950 Siepielski, A.M., Nemirov, A., Cattivera, M. & Nickerson, A. (2016). Experimental  
951 evidence for an eco-evolutionary coupling between local adaptation and  
952 intraspecific competition. *The American Naturalist* 187, 447 - 456.  
953

- 954 Trivers, R.L. & Willard, D.E. (1973). Natural selection of parental ability to vary  
955 sex ratio of offspring. *Science*, 179, 90 - 92.  
956
- 957 van Heerwaarden, B., Kellermann, V., Schiffer, M., Blacket, M., Sgrò, C.M. &  
958 Hoffmann, A.A. (2009). Testing evolutionary hypotheses about species  
959 borders: patterns of genetic variation towards the southern borders of  
960 two rainforest *Drosophila* and a related habitat generalist. *Proceedings of*  
961 *the Royal Society B.*, 276, 1517 - 1526.  
962
- 963 Wisz, M.S., Pottier, J., Kissling, W.D., Pellissier, L., Lenoir, J., Damgaard, C.F. *et al.*  
964 (2013). The role of biotic interactions in shaping distributions and  
965 realised assemblages of species: implications for species distribution  
966 modelling. *Biological Reviews*, 88, 15-30.  
967  
968  
969  
970  
971

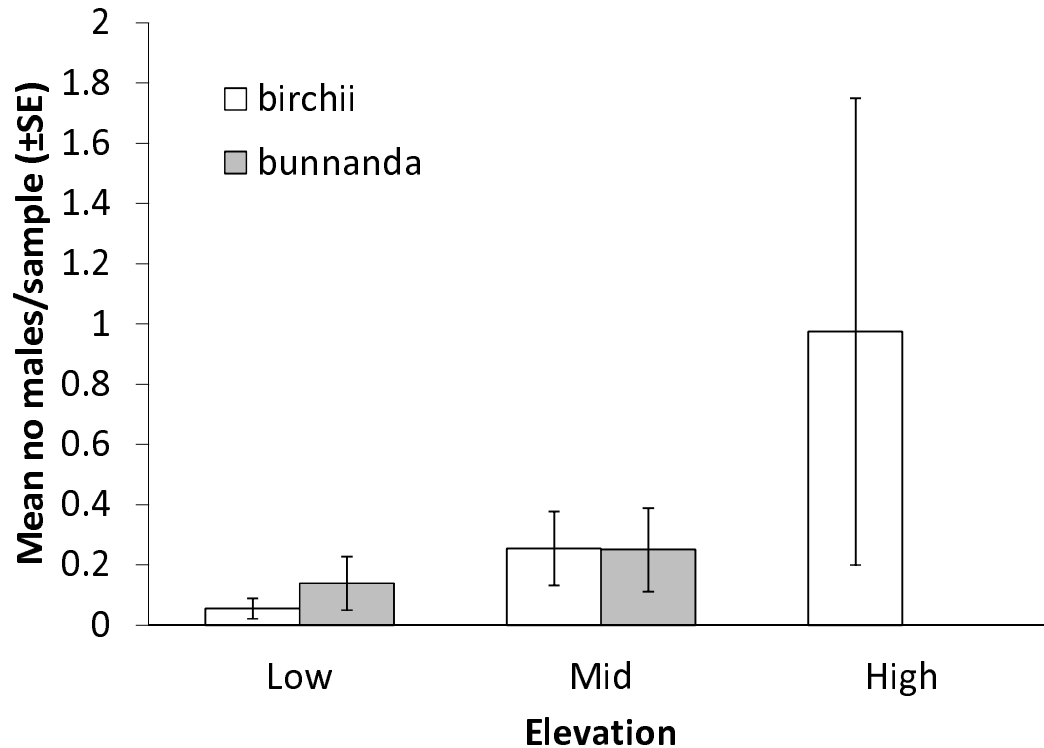

**Figure 1.** Abundance of *Drosophila birchii* (white bars) and *D. bunnanda* (grey bars) males caught in field traps at Paluma between March – June 2017, including the period when the caged transplant experiment was conducted. Bars indicate the mean number of males of each species caught per trap per day, with error bars indicating standard errors among days.

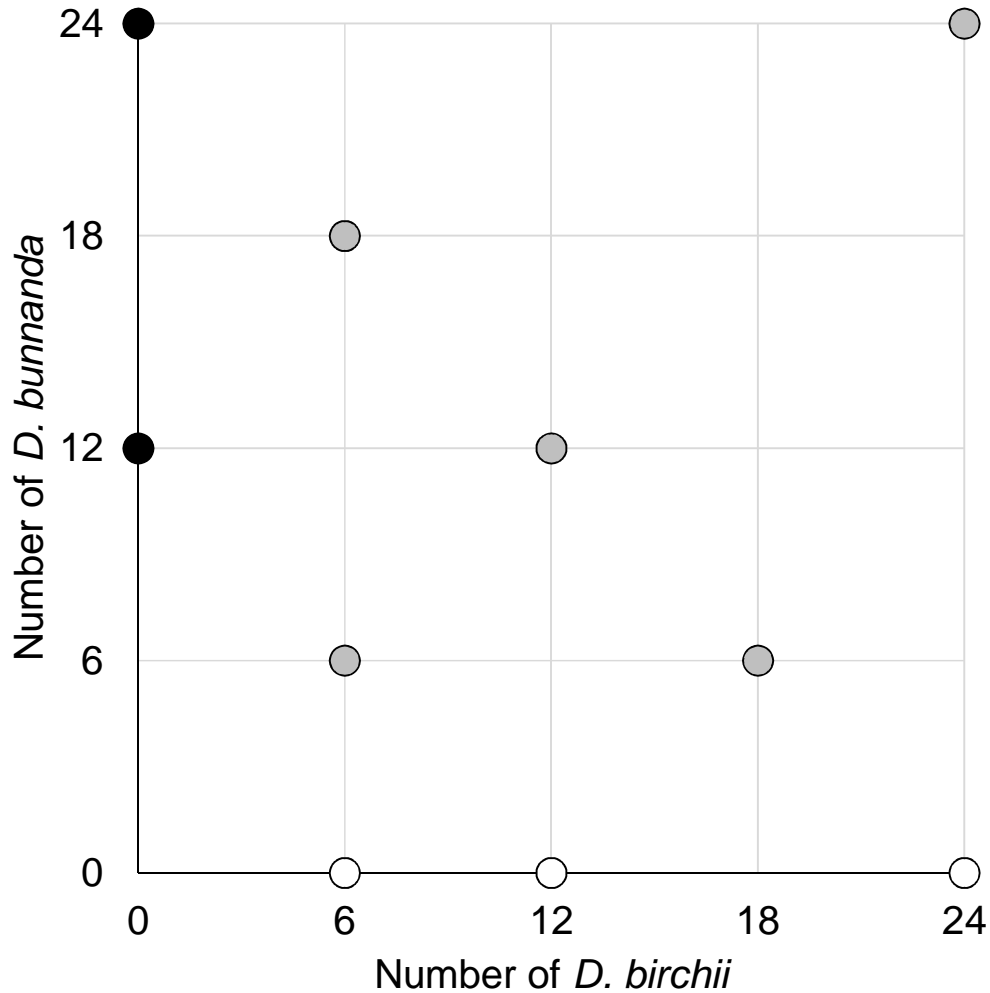

**Figure 2.** Density treatments in vials, each of which were transplanted to high, middle and low elevation sites at Paluma (average 32 vials/treatment/site). There were 10 treatments, representing different numbers and/or ratios of *D. birchii* and *D. bunnanda*. White circles are treatments with only *D. birchii*, black circles are treatments with only *D. bunnanda*, and grey circles are treatments with a combination of both species.

(i) *Drosophila birchii*

(A) Productivity

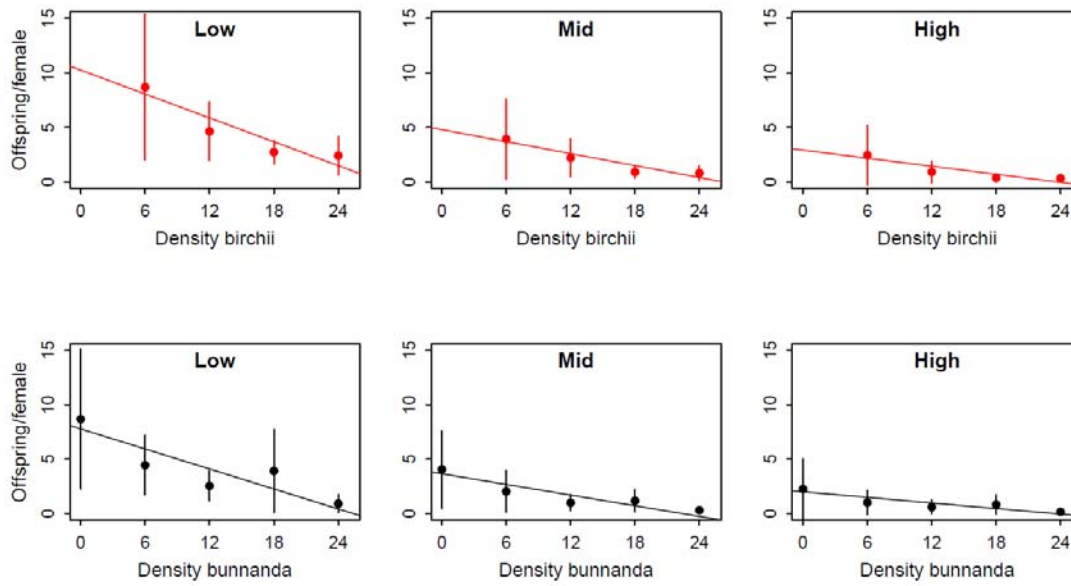

(B) Sex ratio

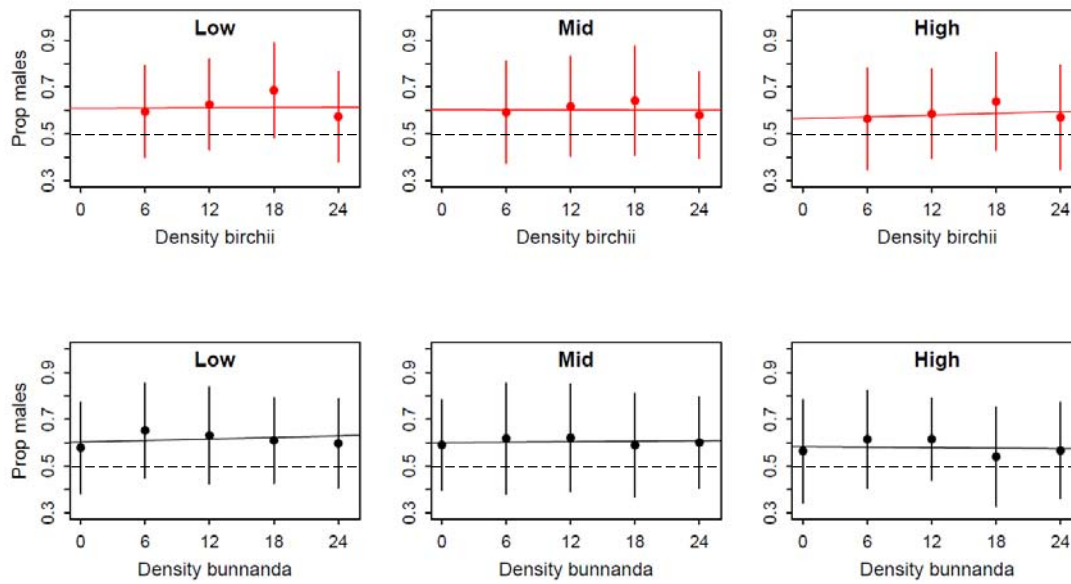

### (C) Emergence time

#### Males

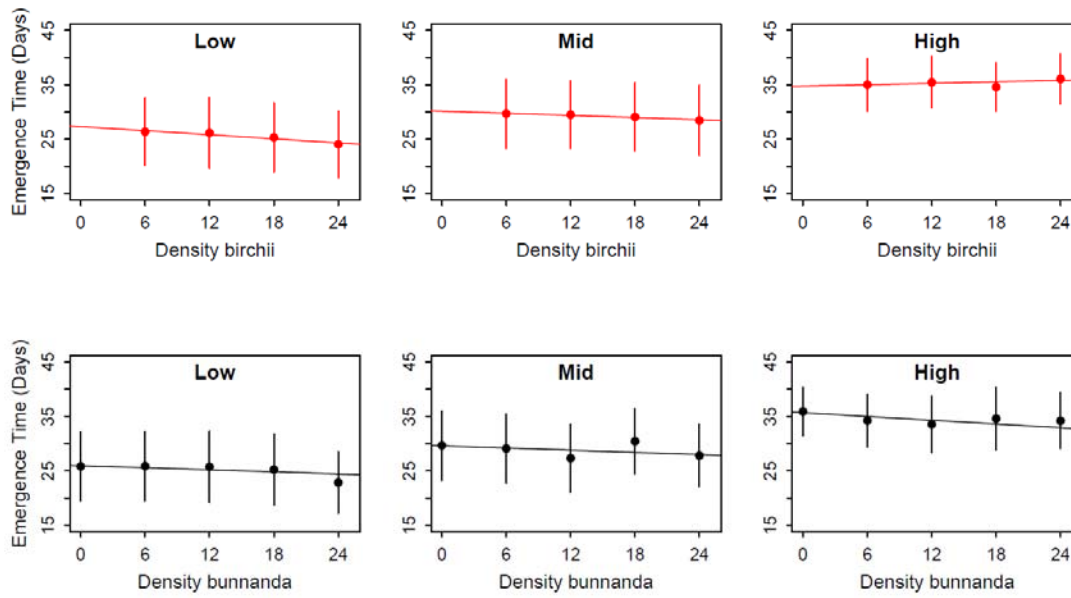

#### Females

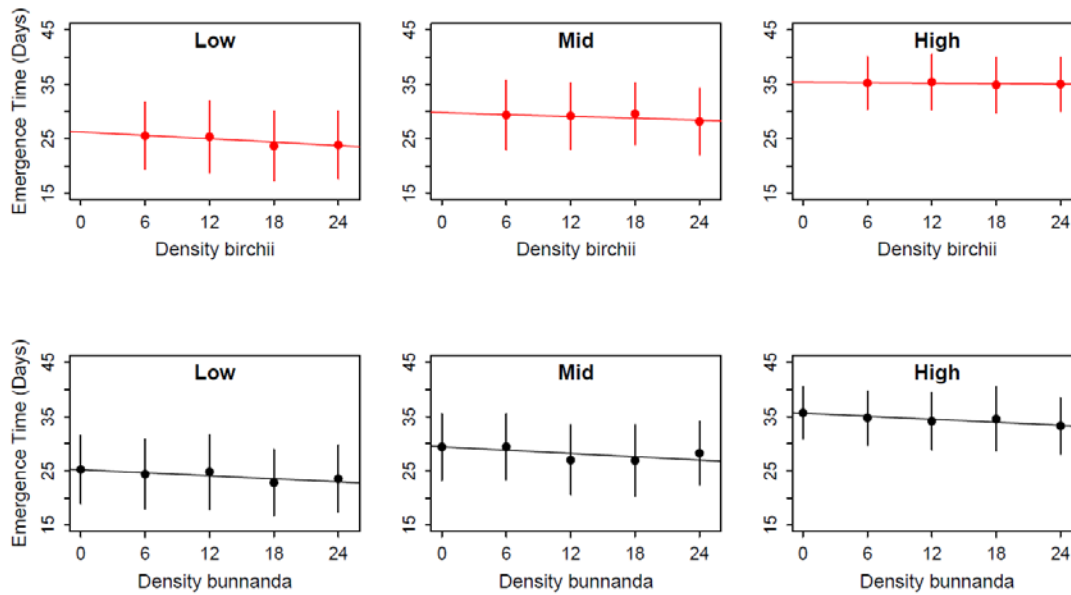

**(D) Wing size**

**Males**

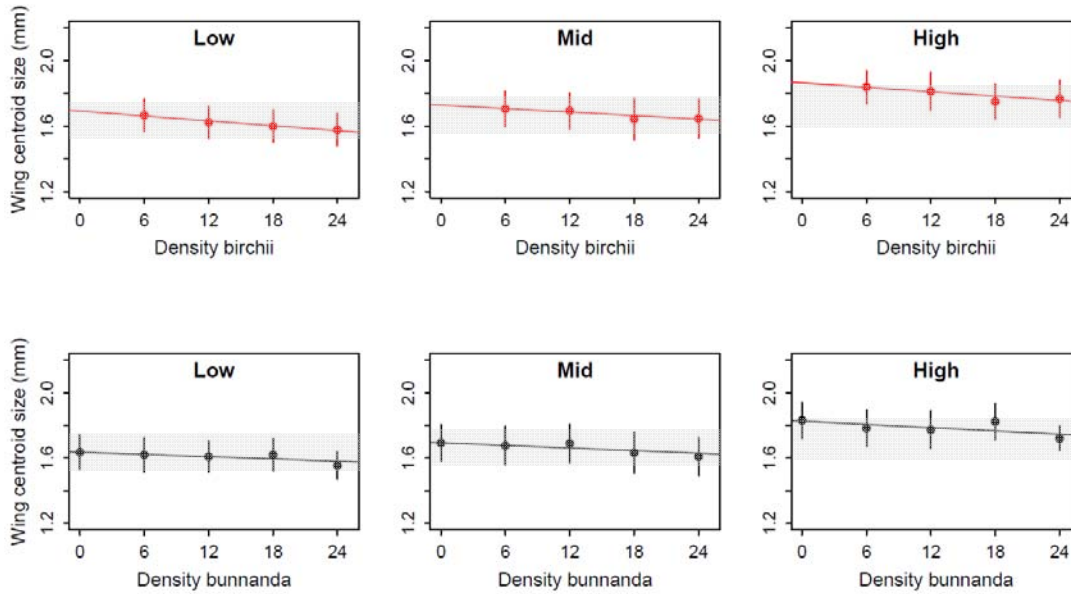

**Females**

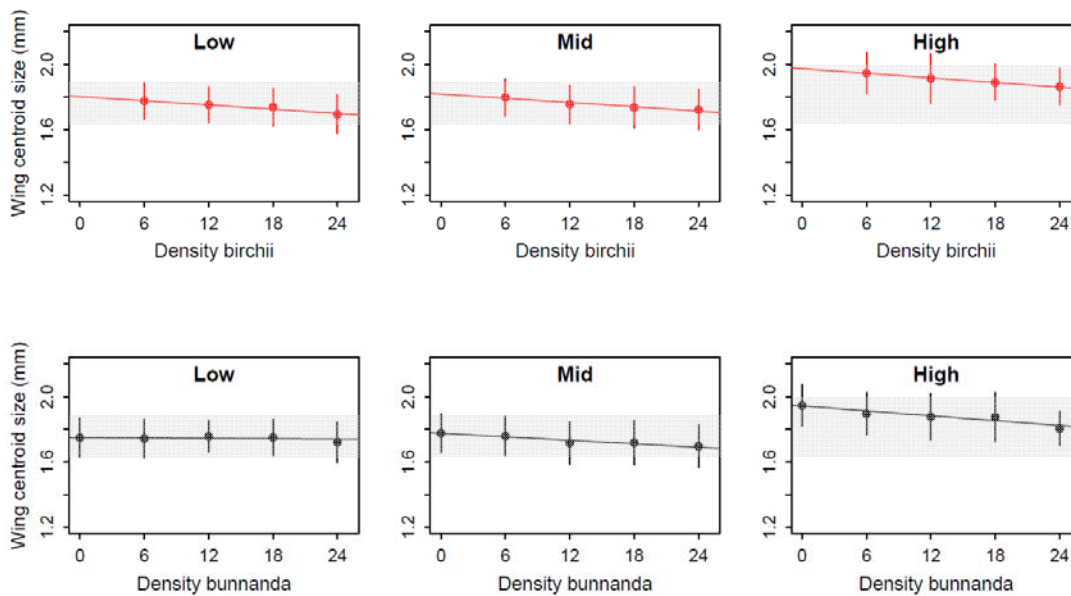

(ii) *Drosophila bunnanda*

(A) Productivity

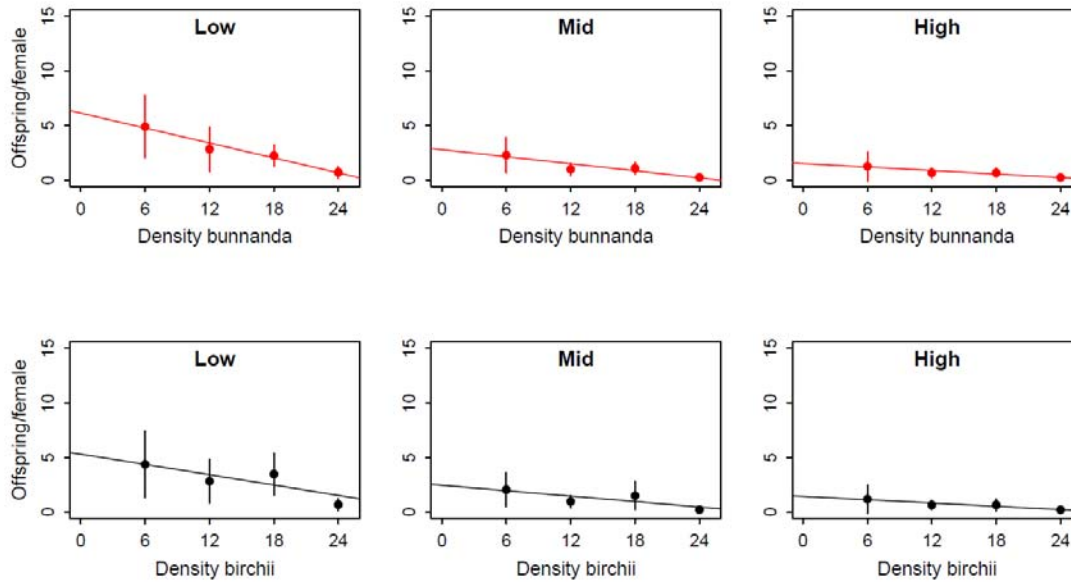

(B) Sex ratio

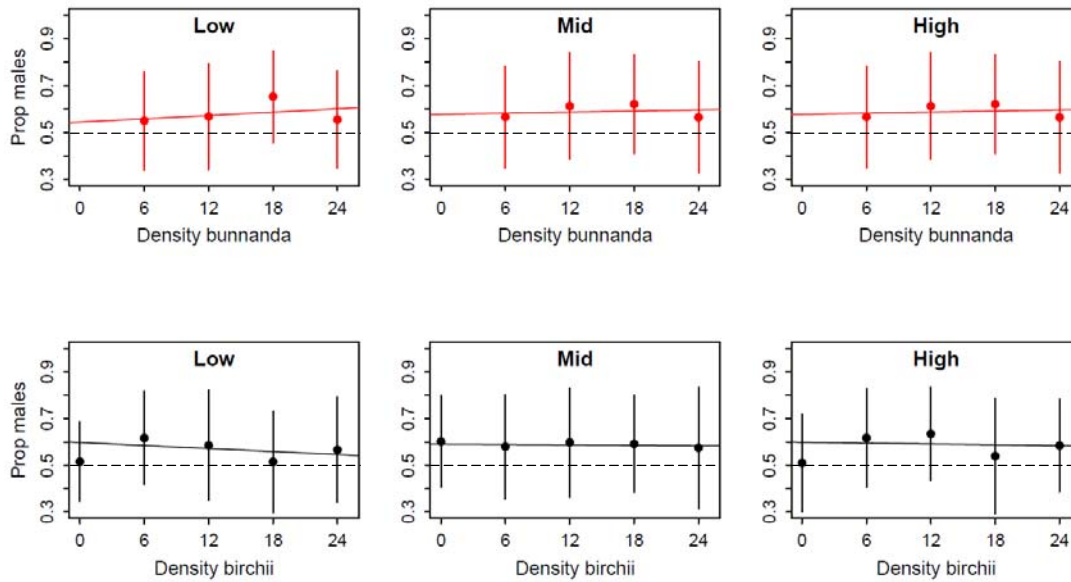



### (C) Emergence time

#### Males

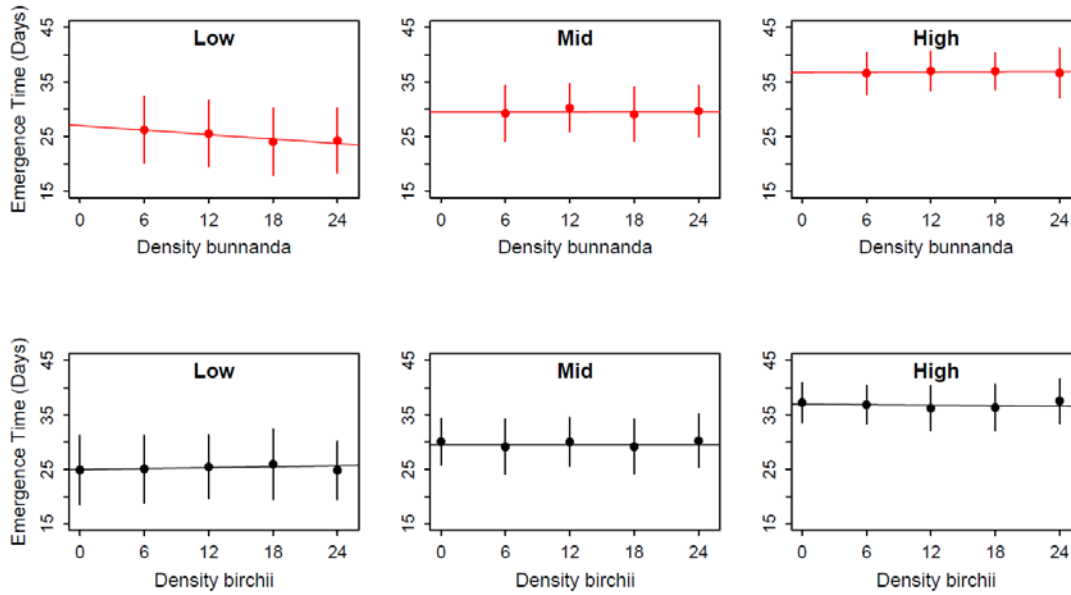

#### Females

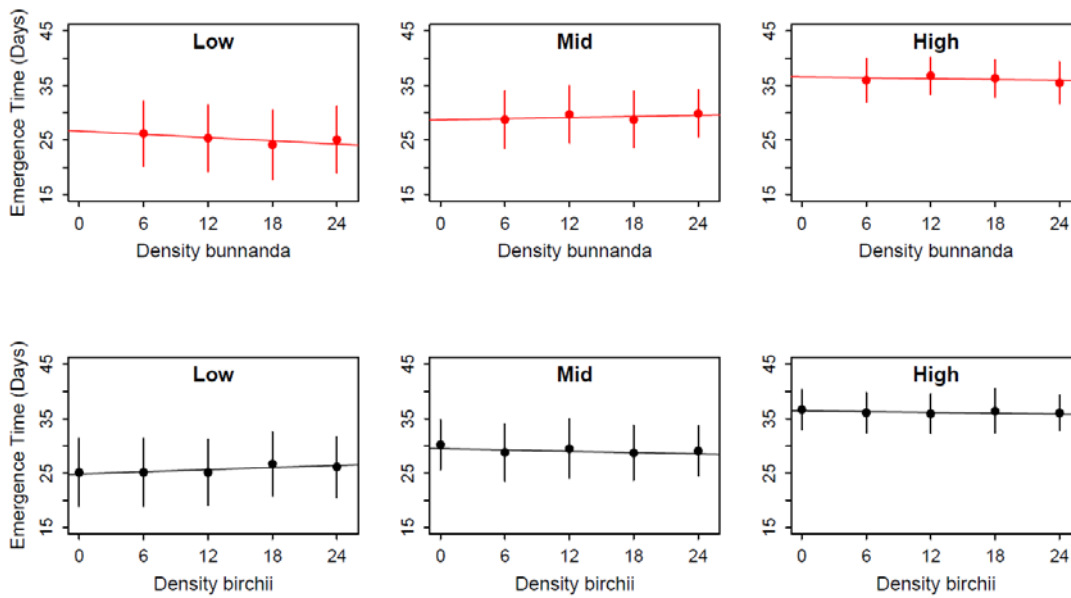

## (D) Wing size

### Males

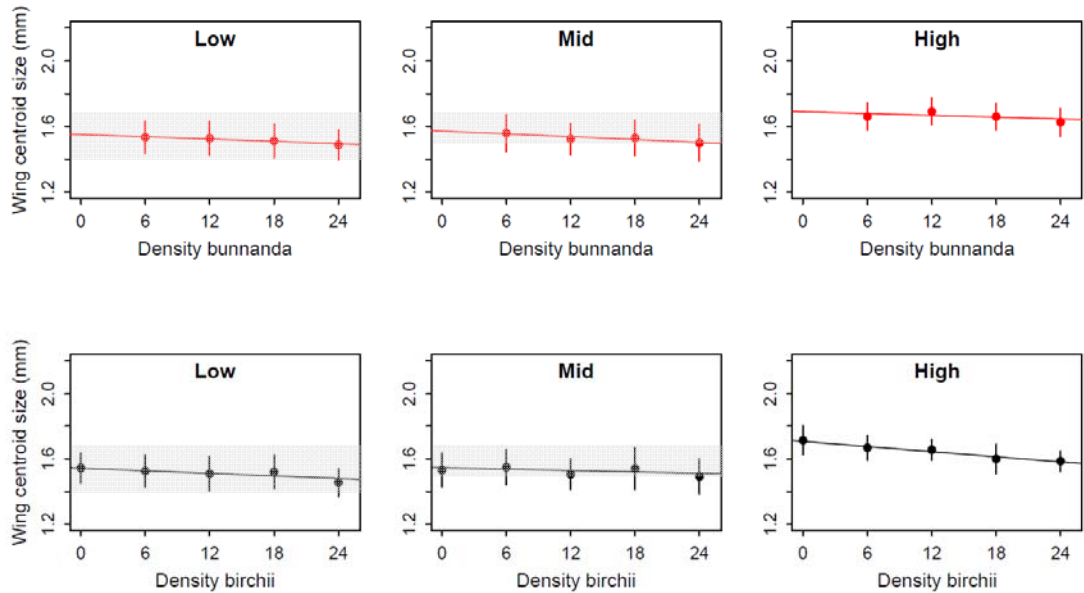

### Females

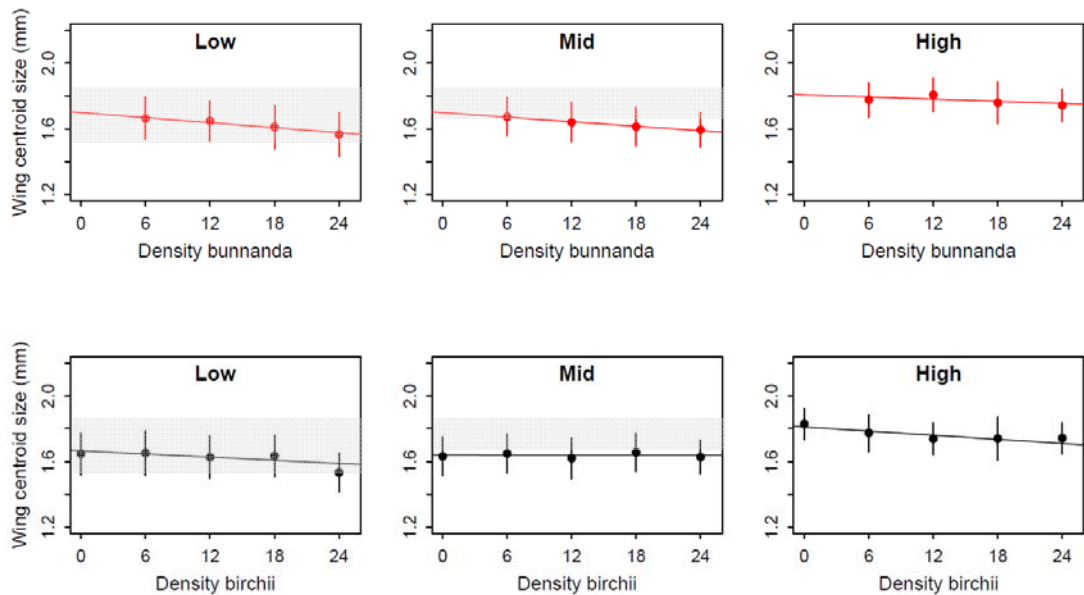

**Figure 3.** Effect of intraspecific competition (red markers and lines) and interspecific competition (black markers and lines) on productivity, sex ratio, emergence time and wing size of (i) *Drosophila birchii* and (ii) *D. bunnanda* at elevations spanning the abiotic environmental range of both species. Points are means of predicted values from (generalised) linear mixed models that included intraspecific density, interspecific density, elevation and all interactions. Error bars are standard deviations. Lines are the partial regression lines estimated from these models, and

therefore represent the independent effect of each type of competition, after accounting for other sources of variation. Where relevant, predicted values have been back-transformed so they are on the original scale. Dashed lines on plots of sex ratio represent an equal sex ratio in the offspring (proportion males = 0.5), therefore values above this line indicate a male-biased sex ratio and values below the line a female-biased sex ratio. The shaded regions on wing size plots show the area bounded by 1 standard deviation either side of the mean wing size of field-caught flies of the relevant sex and species at that elevation.

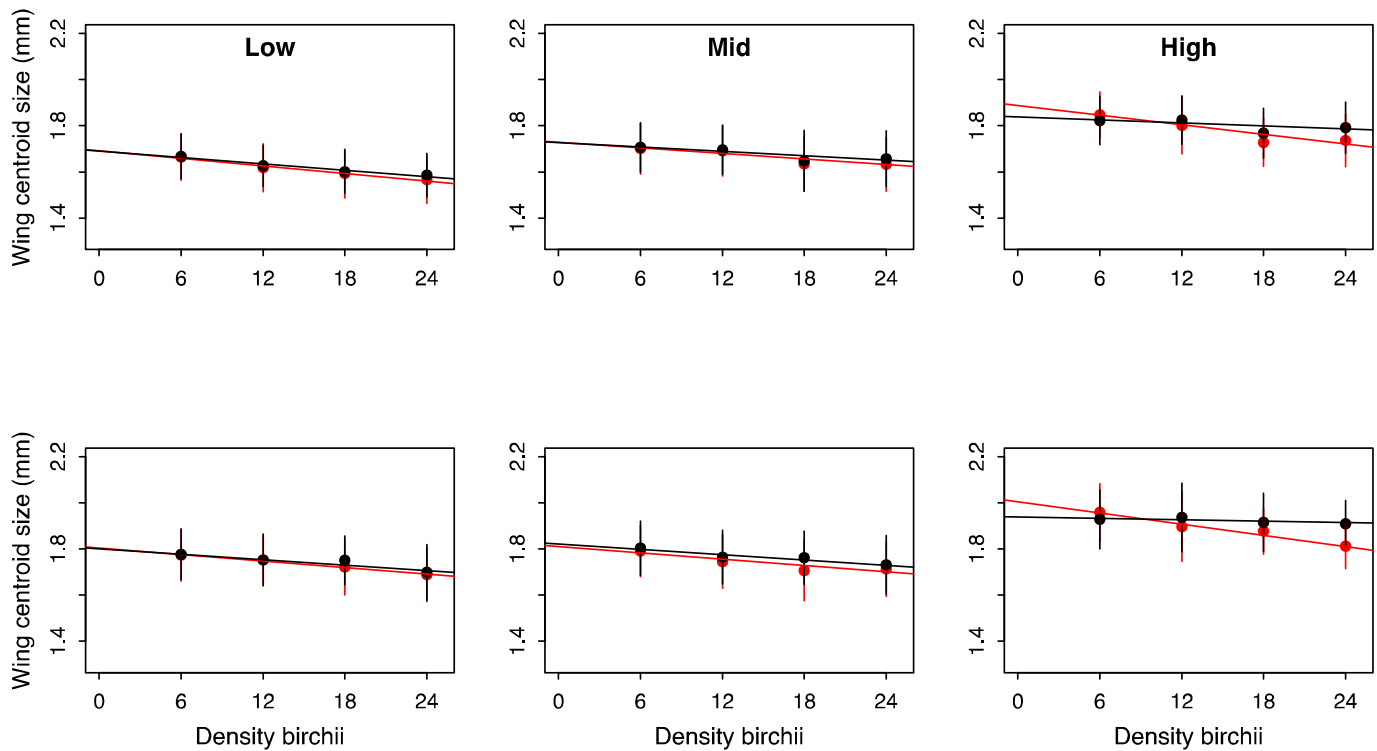

**Figure 4.** Effect of intraspecific competition (given by the density of *D. birchii*) on wing size of *Drosophila birchii* males (top) and females (bottom) from low elevation (red points) and high elevation (black points) source populations, when transplanted to the low, mid and high elevation sites. Points are means of predicted values from linear mixed models that included intraspecific density, interspecific density, source elevation and all interactions, fitted separately for males and females. Error bars are standard deviations. Lines are the partial regression lines estimated from these models, and therefore represent the independent effect of intraspecific competition, after accounting for other sources of variation. Intraspecific competition caused a significant reduction in wing size of both males and females at all transplant sites. However, the response of low and high elevation source populations only differed at the high elevation site, where intraspecific competition caused a greater reduction in the wing size of flies sourced from low elevation than those from high elevation in both males and females.

**Table 1.** Summary of effects of competition (Intraspecific and Interspecific density) and transplant site (Elevation) on productivity, sex ratio, emergence time and wing size in *Drosophila birchii* and *D. bunnanda*. For *D. birchii*, we additionally tested for divergence between flies sourced from high and low elevation sites (Source elevation). These effects and all 2-way interactions were fitted as fixed factors in (generalised) linear mixed models for each species and trait. For emergence time and wing size, separate models were fitted for each sex. Population was included as a random factor in all models, and vial was additionally included as a random factor in models analysing variation in emergence time and wing size. Values shown for effects on each trait are  $\chi^2$  values obtained from a comparison of the log likelihood of models with and without that fixed effect term included. Within each species, we used a Bonferroni-corrected significance threshold of  $P = 0.013$  to test each fixed effect, to account for testing of multiple traits. Tests where the  $P$ -value for a trait was below this threshold are highlighted and in bold italics. Symbols indicate the range within which  $P$ -values fall. See legend beneath table.

| Species                                   | Effect                                   | df | Trait                      |                            |                            |                            |                            |                            |
|-------------------------------------------|------------------------------------------|----|----------------------------|----------------------------|----------------------------|----------------------------|----------------------------|----------------------------|
|                                           |                                          |    | Productivity               | Sex ratio                  | Emergence time             |                            | Wing size                  |                            |
|                                           |                                          |    |                            |                            | Males                      | Females                    | Males                      | Females                    |
| <i>Drosophila birchii</i><br>(847 vials)  | Intraspecific density                    | 1  | <b>293.2<sup>***</sup></b> | 0.016                      | <b>14.72<sup>**</sup></b>  | <b>9.077<sup>*</sup></b>   | <b>122.4<sup>***</sup></b> | <b>69.51<sup>***</sup></b> |
|                                           | Interspecific density                    | 1  | <b>297.5<sup>***</sup></b> | <b>20.65<sup>***</sup></b> | <b>19.18<sup>***</sup></b> | <b>30.72<sup>***</sup></b> | <b>36.88<sup>***</sup></b> | <b>14.82<sup>**</sup></b>  |
|                                           | Elevation                                | 2  | <b>390.8<sup>***</sup></b> | 8.785 <sup>†</sup>         | <b>523.4<sup>***</sup></b> | <b>680.9<sup>***</sup></b> | <b>510.9<sup>***</sup></b> | <b>340.9<sup>***</sup></b> |
|                                           | Source elevation                         | 1  | 0.354                      | 0.347                      | 2.475                      | 4.129 <sup>†</sup>         | 1.429                      | 1.794                      |
|                                           | Intraspecific x interspecific density    | 1  | <b>135.8<sup>***</sup></b> | 0.217                      | 0.070                      | <b>9.495<sup>*</sup></b>   | <b>6.598<sup>†</sup></b>   | <b>13.05<sup>**</sup></b>  |
|                                           | Intraspecific density x Elevation        | 2  | <b>14.84<sup>**</sup></b>  | 0.542                      | 8.795 <sup>†</sup>         | 1.348                      | 1.663                      | 0.170                      |
|                                           | Intraspecific density x Source elevation | 1  | 1.402                      | 0.025                      | 1.497                      | <b>10.79<sup>*</sup></b>   | 2.037                      | 3.885 <sup>†</sup>         |
|                                           | Interspecific density x Elevation        | 2  | <b>33.23<sup>***</sup></b> | 8.376 <sup>†</sup>         | 0.837                      | 0.049                      | 0.027                      | <b>13.40<sup>*</sup></b>   |
|                                           | Interspecific density x Source elevation | 1  | 0                          | 0.037                      | 0.123                      | 0.056                      | 0.645                      | 1.327                      |
|                                           | Elevation x Source elevation             | 2  | 2.535                      | 2.005                      | 0.951                      | 1.218                      | 0.683                      | 0.745                      |
| <i>Drosophila bunnanda</i><br>(572 vials) | Intraspecific density                    | 1  | <b>166.9<sup>***</sup></b> | <b>9.315<sup>*</sup></b>   | 5.609 <sup>†</sup>         | <b>535.8<sup>***</sup></b> | <b>25.19<sup>***</sup></b> | <b>48.29<sup>***</sup></b> |
|                                           | Interspecific density                    | 1  | <b>89.92<sup>***</sup></b> | 2.326                      | 0.105                      | 3.706                      | <b>25.54<sup>***</sup></b> | <b>12.90<sup>**</sup></b>  |
|                                           | Elevation                                | 2  | <b>267.6<sup>***</sup></b> | 6.762 <sup>†</sup>         | <b>542.8<sup>***</sup></b> | <b>539.6<sup>***</sup></b> | <b>293.6<sup>***</sup></b> | <b>170.6<sup>***</sup></b> |

|                                       |   |                            |       |        |        |        |               |
|---------------------------------------|---|----------------------------|-------|--------|--------|--------|---------------|
| Intraspecific x interspecific density | 1 | <b>36.58<sup>***</sup></b> | 2.408 | 3.235  | 0.729  | 1.916  | 0.177         |
| Intraspecific density x Elevation     | 2 | <b>36.81<sup>***</sup></b> | 2.503 | 8.451† | 7.244† | 2.135  | <b>10.35*</b> |
| Interspecific density x Elevation     | 2 | 1.238                      | 5.710 | 0.407  | 5.569  | 8.347† | 5.714         |

\*\*\*  $P < 0.0001$ ; \*\*  $0.0001 \leq P < 0.001$ ; \*  $0.001 \leq P < 0.013$ ; †  $0.013 \leq P < 0.05$

**Table 2.** Effects of intraspecific and interspecific competition on productivity, sex ratio, emergence time and wing size in *Drosophila birchii* and *D. bunnanda* at each transplant elevation. Shown are estimates of the partial regression coefficients ( $\beta$ ) for effects of intraspecific and interspecific density (i.e. holding the other variable constant) on each trait, and its standard error (SE). These were obtained from (generalised) linear mixed models fitted separately for each species, trait and elevation, and separately for males and females for emergence time and wing size. Also shown is the intercept and its SE for each model, back-transformed where necessary so that all values are on the original scale. For productivity and sex ratio, the expected change in the trait value with respect to each predictor variable described by the coefficients ( $\beta$ ) is on the transformed/link scale used in the model (square root for productivity, log for sex ratio), and so should be interpreted accordingly. The final column gives the ratio of the two partial regression coefficients, which we use to evaluate the relative effect of intraspecific vs interspecific competition on each trait at each elevation. This was calculated as  $\beta_{\text{Intraspecific}} / \beta_{\text{Interspecific}}$ , therefore absolute values greater than 1 indicate a stronger effect of intraspecific competition, and absolute values less than 1 a stronger effect of interspecific competition. Negative values indicate that the two types of competition had opposite effects (i.e. one type increased the value of the trait, while the other decreased it). Within each species, we used a Bonferroni-corrected significance threshold of  $P = 0.013$  to test each fixed effect, to account for testing of multiple traits. Cases where the partial regression coefficient was significant at this threshold are highlighted and in bold italics. Tests where  $P < 0.05$  but not below the corrected threshold are in italics. Symbols indicate the range within which  $P$ -values fall. See legend beneath table.

|                           | Elevation          | Trait                           | Intercept (SE)          | $\beta_{\text{Intraspecific}} (\pm \text{SE})$ | $\beta_{\text{Interspecific}} (\pm \text{SE})$ | $\beta_{\text{Intraspecific}} / \beta_{\text{Interspecific}}$ |  |
|---------------------------|--------------------|---------------------------------|-------------------------|------------------------------------------------|------------------------------------------------|---------------------------------------------------------------|--|
| <i>Drosophila birchii</i> | Low<br>(278 vials) | Productivity                    | 17.13 (0.02)            | <b>-0.109 (0.009)***</b>                       | <b>-0.126 (0.011)***</b>                       | 0.865                                                         |  |
|                           |                    | Sex ratio                       | 0.462 (0.52)            | 0.001 (0.005)                                  | <b>0.027 (0.009)***</b>                        | 0.037                                                         |  |
|                           |                    | Emergence time                  |                         |                                                |                                                |                                                               |  |
|                           |                    | Males                           | 28.33 (0.69)            | <b>-0.123 (0.043)***</b>                       | <b>-0.062 (0.059)*</b>                         | 1.980                                                         |  |
|                           |                    | Females                         | 28.22 (0.64)            | <b>-0.171 (0.040)†</b>                         | <b>-0.220 (0.058)**</b>                        | 0.777                                                         |  |
|                           |                    | Wing size (x 10 <sup>-3</sup> ) |                         |                                                |                                                |                                                               |  |
|                           | Males              | 1.708 (0.013)                   | <b>-5.31 (0.712)***</b> | <b>-4.93 (0.981)***</b>                        | 1.077                                          |                                                               |  |
|                           | Females            | 1.808 (0.017)                   | <b>-4.71 (0.937)***</b> | -2.93 (1.37)                                   | 1.608                                          |                                                               |  |
|                           | Mid<br>(288 vials) | Productivity                    | 8.827 (0.01)            | <b>-0.084 (0.006)***</b>                       | <b>-0.111 (0.008)***</b>                       | 0.757                                                         |  |
|                           | Sex ratio          | 0.498 (0.50)                    | -0.003 (0.008)          | 0.008 (0.014)                                  | 0.375                                          |                                                               |  |
| Emergence time            |                    |                                 |                         |                                                |                                                |                                                               |  |

|  |                                 |               |                                     |                                     |        |
|--|---------------------------------|---------------|-------------------------------------|-------------------------------------|--------|
|  | Males                           | 30.92 (0.72)  | -0.092 (0.049)                      | -0.066 (0.074) <sup>†</sup>         | 1.394  |
|  | Females                         | 32.30 (0.74)  | -0.188 (0.048)                      | <b>-0.252 (0.070)<sup>*</sup></b>   | 0.746  |
|  | Wing size (x 10 <sup>-3</sup> ) |               |                                     |                                     |        |
|  | Males                           | 1.739 (0.015) | <b>-3.91 (1.01)<sup>***</sup></b>   | <b>-3.38 (1.50)<sup>**</sup></b>    | 1.157  |
|  | Females                         | 1.841 (0.019) | <b>-4.70 (1.25)<sup>***</sup></b>   | <b>-7.12 (1.92)<sup>**</sup></b>    | 0.660  |
|  | Productivity                    | 4.227 (0.01)  | <b>-0.070 (0.007)<sup>***</sup></b> | <b>-0.070 (0.009)<sup>***</sup></b> | 1.00   |
|  | Sex ratio                       | 0.416 (0.54)  | 0.011 (0.012)                       | -0.008 (0.018)                      | -1.375 |
|  | Emergence time                  |               |                                     |                                     |        |
|  | Males                           | 35.70 (0.83)  | 0.010 (0.054)                       | <b>-0.060 (0.079)<sup>*</sup></b>   | -0.167 |
|  | Females                         | 36.30 (0.74)  | -0.022 (0.050)                      | <b>-0.102 (0.070)<sup>*</sup></b>   | 0.216  |
|  | Wing size (x 10 <sup>-3</sup> ) |               |                                     |                                     |        |
|  | Males                           | 1.842 (0.022) | <b>-2.41 (1.31)<sup>***</sup></b>   | -2.08 (1.88) <sup>†</sup>           | 1.159  |
|  | Females                         | 1.963 (0.027) | <b>-2.02 (1.59)<sup>**</sup></b>    | <b>-7.19 (2.12)<sup>**</sup></b>    | 0.281  |
|  | Productivity                    | 10.98 (0.03)  | <b>-0.090 (0.011)<sup>***</sup></b> | <b>-0.070 (0.012)<sup>***</sup></b> | 1.286  |
|  | Sex ratio                       | 0.397 (0.54)  | <b>0.019 (0.010)<sup>*</sup></b>    | -0.013 (0.013) <sup>†</sup>         | -1.462 |
|  | Emergence time                  |               |                                     |                                     |        |
|  | Males                           | 27.48 (1.05)  | <b>-0.163 (0.064)<sup>*</sup></b>   | -0.055 (0.085)                      | 2.964  |
|  | Females                         | 26.74 (0.92)  | <b>-0.137 (0.058)<sup>†</sup></b>   | 0.002 (0.071) <sup>†</sup>          | -68.50 |
|  | Wing size (x 10 <sup>-3</sup> ) |               |                                     |                                     |        |
|  | Males                           | 1.567 (0.019) | <b>-2.49 (1.09)<sup>**</sup></b>    | <b>-2.26 (1.41)<sup>**</sup></b>    | 1.102  |
|  | Females                         | 1.748 (0.025) | <b>-6.89 (1.54)<sup>***</sup></b>   | <b>-4.87 (1.81)<sup>**</sup></b>    | 1.415  |
|  | Productivity                    | 5.354 (0.02)  | <b>-0.064 (0.008)<sup>***</sup></b> | <b>-0.061 (0.010)<sup>***</sup></b> | 1.049  |
|  | Sex ratio                       | 0.502 (0.56)  | -0.002 (0.015)                      | -0.030 (0.021)                      | 0.067  |
|  | Emergence time                  |               |                                     |                                     |        |
|  | Males                           | 29.92 (0.94)  | -0.032 (0.058)                      | -0.054 (0.081)                      | 0.593  |
|  | Females                         | 28.54 (1.00)  | 0.041 (0.060)                       | 0.038 (0.079)                       | 1.079  |
|  | Wing size (x 10 <sup>-3</sup> ) |               |                                     |                                     |        |

*Drosophila bunnanda*



|                     |                                 |               |                          |                                 |        |
|---------------------|---------------------------------|---------------|--------------------------|---------------------------------|--------|
|                     | Males                           | 1.603 (0.025) | <b>-4.23 (1.53)*</b>     | -3.84 (2.08)                    | 1.102  |
|                     | Females                         | 1.758 (0.026) | <b>-7.99 (1.60)***</b>   | -5.61 (2.19)                    | 1.424  |
|                     | Productivity                    | 3.500 (0.02)  | <b>-0.052 (0.008)***</b> | <b>-0.061 (0.009)***</b>        | 0.852  |
|                     | Sex ratio                       | 0.497 (0.57)  | -0.014 (0.016)           | -0.025 (0.027)                  | 0.560  |
|                     | Emergence time                  |               |                          |                                 |        |
|                     | Males                           | 38.47 (0.95)  | -0.089 (0.057)           | -0.174 (0.086)                  | 0.511  |
|                     | Females                         | 36.26 (0.88)  | 0.005 (0.052)            | -0.020 (0.074)                  | -0.250 |
| High<br>(190 vials) | Wing size (x 10 <sup>-3</sup> ) |               |                          |                                 |        |
|                     | Males                           | 1.750 (0.021) | -3.33 (1.24)             | <b>-8.15 (1.88)***</b>          | 0.409  |
|                     | Females                         | 1.858 (0.033) | -4.50 (2.01)             | <b>-8.83 (2.70)<sup>†</sup></b> | 0.510  |

\*\*\*  $P < 0.0001$ ; \*\*  $0.0001 \leq P < 0.001$ ; \*  $0.001 \leq P < 0.01$ ;  $\dagger 0.01 \leq P < 0.05$
